# Supplementary material for: Anticholinesterase and Antityrosinase Secondary Metabolites from the Fungus Xylobolus subpileatus
Source: MDPI journal article supplement (doi:10.3390/molecules29010213), 2023-12-30
Supplement: s1 [file s1]

# Anticholinesterase and Antityrosinase Secondary Metabolites from the Fungus *Xylobolus subpileatus*

Kristóf Felegyi<sup>1</sup>, Zsófia Garádi<sup>1,2</sup>, Elżbieta Studzińska-Sroka<sup>3</sup>, Viktor Papp<sup>4</sup>, Imre Boldizsár<sup>1,5</sup>, András Dancsó<sup>2</sup>, Szabolcs Béni<sup>1,6</sup>, Przemysław Zalewski<sup>3</sup> and Attila Ványolós<sup>1,\*</sup>

<sup>1</sup> Department of Pharmacognosy, Semmelweis University, 1085 Budapest, Hungary; felegyi.kristof@pharma.semmelweis-univ.hu (K.F.); garadi.zsofia@pharma.semmelweis-univ.hu (Z.G.); boldizsar.imre@semmelweis.hu (I.B.);

<sup>2</sup> Directorate of Drug Substance Development, Egis Pharmaceuticals Plc., 1475 Budapest, Hungary

<sup>3</sup> Department of Pharmacognosy and Biomaterials, Poznan University of Medical Sciences, Rokietnicka 3 Str, 60-806 Poznan, Poland; elastudzinska@ump.edu.pl (E.S.-S.); pzalewski@ump.edu.pl (P.Z.)

<sup>4</sup> Department of Botany, Hungarian University of Agriculture and Life Sciences, 1118 Budapest, Hungary; papp.viktor@uni-mate.hu

<sup>5</sup> Department of Plant Anatomy, Institute of Biology, Eötvös Loránd University, 1117 Budapest, Hungary

<sup>6</sup> Department of Analytical Chemistry, Institute of Chemistry, Eötvös Loránd University, 1117 Budapest, Hungary; szabolcs.beni@ttk.elte.hu

\* Correspondence: vanyolos.attila@semmelweis.hu

## Contents

|                                                                                                        |    |
|--------------------------------------------------------------------------------------------------------|----|
| Figure S1. HRESI-MS spectrum of compound <b>1</b> .....                                                | 6  |
| Figure S2. MS-MS spectrum of compound <b>1</b> .....                                                   | 6  |
| Figure S3. <sup>1</sup> H spectrum of compound <b>1</b> (600 MHz, CDCl <sub>3</sub> , 295 K).....      | 7  |
| Figure S4. <sup>13</sup> C spectrum of compound <b>1</b> (150 MHz, CDCl <sub>3</sub> , 295 K).....     | 7  |
| Figure S5. COSY spectrum of compound <b>1</b> (600 MHz, CDCl <sub>3</sub> , 295 K).....                | 8  |
| Figure S6. DEPT-edited HSQC spectrum of compound <b>1</b> (600 MHz, CDCl <sub>3</sub> , 295 K) .....   | 8  |
| Figure S7. HMBC spectrum of compound <b>1</b> (600 MHz, CDCl <sub>3</sub> , 295 K) .....               | 9  |
| Figure S8. ROESY spectrum of compound <b>1</b> (600 MHz, CDCl <sub>3</sub> , 295 K) .....              | 9  |
| Figure S9. HRESI-MS spectrum of compound <b>2</b> .....                                                | 10 |
| Figure S10. MS-MS spectrum of compound <b>2</b> .....                                                  | 10 |
| Figure S11. <sup>1</sup> H spectrum of compound <b>2</b> (600 MHz, CDCl <sub>3</sub> , 295 K).....     | 11 |
| Figure S12. <sup>13</sup> C spectrum of compound <b>2</b> (150 MHz, CDCl <sub>3</sub> , 295 K) .....   | 11 |
| Figure S13. COSY spectrum of compound <b>2</b> (600 MHz, CDCl <sub>3</sub> , 295 K).....               | 12 |
| Figure S14. DEPT-edited HSQC spectrum of compound <b>2</b> (600 MHz, CDCl <sub>3</sub> , 295 K) .....  | 12 |
| Figure S15. HMBC spectrum of compound <b>2</b> (600 MHz, CDCl <sub>3</sub> , 295 K) .....              | 13 |
| Figure S16. ROESY spectrum of compound <b>2</b> (600 MHz, CDCl <sub>3</sub> , 295 K) .....             | 13 |
| Figure S17. HRESI-MS spectrum of compound <b>3</b> .....                                               | 14 |
| Figure S18. MS-MS spectrum of compound <b>3</b> .....                                                  | 14 |
| Figure S19. <sup>1</sup> H spectrum of compound <b>3</b> (600 MHz, CDCl <sub>3</sub> , 295 K).....     | 15 |
| Figure S20. <sup>13</sup> C spectrum of compound <b>3</b> (150 MHz, CDCl <sub>3</sub> , 295 K) .....   | 15 |
| Figure S21. COSY spectrum of compound <b>3</b> (600 MHz, CDCl <sub>3</sub> , 295 K).....               | 16 |
| Figure S22. DEPT-edited HSQC spectrum of compound <b>3</b> (600 MHz, CDCl <sub>3</sub> , 295 K) .....  | 16 |
| Figure S23. HMBC spectrum of compound <b>3</b> (600 MHz, CDCl <sub>3</sub> , 295 K) .....              | 17 |
| Figure S24. HRESI-MS spectrum of compound <b>4</b> .....                                               | 18 |
| Figure S25. MS-MS spectrum of compound <b>4</b> .....                                                  | 18 |
| Figure S26. <sup>1</sup> H spectrum of compound <b>4</b> (600 MHz, THF-d <sub>8</sub> , 295 K) .....   | 19 |
| Figure S27. <sup>13</sup> C spectrum of compound <b>4</b> (150 MHz, THF-d <sub>8</sub> , 295 K) .....  | 19 |
| Figure S28. COSY spectrum of compound <b>4</b> (600 MHz, THF-d <sub>8</sub> , 295 K).....              | 20 |
| Figure S29. DEPT-edited HSQC spectrum of compound <b>4</b> (600 MHz, THF-d <sub>8</sub> , 295 K) ..... | 20 |
| Figure S30. HMBC spectrum of compound <b>4</b> (600 MHz, THF-d <sub>8</sub> , 295 K) .....             | 21 |
| Figure S31. ROESY spectrum of compound <b>4</b> (600 MHz, THF-d <sub>8</sub> , 295 K).....             | 21 |
| Figure S32. <sup>1</sup> H spectrum of compound <b>5</b> (600 MHz, CDCl <sub>3</sub> , 295 K).....     | 22 |

|                                                                                                                             |    |
|-----------------------------------------------------------------------------------------------------------------------------|----|
| Figure S33. $^{13}\text{C}$ spectrum of compound <b>5</b> (150 MHz, $\text{CDCl}_3$ , 295 K) .....                          | 23 |
| Figure S34. COSY spectrum of compound <b>5</b> (600 MHz, $\text{CDCl}_3$ , 295 K).....                                      | 23 |
| Figure S35. DEPT-edited HSQC spectrum of compound <b>5</b> (600 MHz, $\text{CDCl}_3$ , 295 K) .....                         | 24 |
| Figure S36. HMBC spectrum of compound <b>5</b> (600 MHz, $\text{CDCl}_3$ , 295 K) .....                                     | 24 |
| Figure S37. ROESY spectrum of compound <b>5</b> (600 MHz, $\text{CDCl}_3$ , 295 K) .....                                    | 25 |
| Figure S38. HRESI-MS spectrum of compound <b>6</b> .....                                                                    | 26 |
| Figure S39. MS-MS spectrum of compound <b>6</b> .....                                                                       | 26 |
| Figure S40. $^1\text{H}$ spectrum of compound <b>6</b> (600 MHz, $\text{THF-d}_8$ , 295 K) .....                            | 27 |
| Figure S41. $^{13}\text{C}$ spectrum of compound <b>6</b> (150 MHz, $\text{THF-d}_8$ , 295 K) .....                         | 27 |
| Figure S42. COSY spectrum of compound <b>6</b> (600 MHz, $\text{THF-d}_8$ , 295 K).....                                     | 28 |
| Figure S43. DEPT-edited HSQC spectrum of compound <b>6</b> (600 MHz, $\text{THF-d}_8$ , 295 K) .....                        | 28 |
| Figure S44. HMBC spectrum of compound <b>6</b> (600 MHz, $\text{THF-d}_8$ , 295 K) .....                                    | 29 |
| Figure S45. ROESY spectrum of compound <b>6</b> (600 MHz, $\text{THF-d}_8$ , 295 K).....                                    | 29 |
| Figure S46. HRESI-MS spectrum of compound <b>7</b> .....                                                                    | 30 |
| Figure S47. MS-MS spectrum of compound <b>7</b> .....                                                                       | 30 |
| Figure S48. $^1\text{H}$ spectrum of compound <b>7</b> (600 MHz, $\text{THF-d}_8$ , 295 K) .....                            | 31 |
| Figure S49. $^{13}\text{C}$ spectrum of compound <b>7</b> (150 MHz, $\text{THF-d}_8$ , 295 K) .....                         | 31 |
| Figure S50. COSY spectrum of compound <b>7</b> (600 MHz, $\text{THF-d}_8$ , 295 K).....                                     | 32 |
| Figure S51. DEPT-edited HSQC spectrum of compound <b>7</b> (600 MHz, $\text{THF-d}_8$ , 295 K) .....                        | 32 |
| Figure S52. HMBC spectrum of compound <b>7</b> (600 MHz, $\text{THF-d}_8$ , 295 K) .....                                    | 33 |
| Figure S53. ROESY spectrum of compound <b>7</b> (600 MHz, $\text{THF-d}_8$ , 295 K).....                                    | 33 |
| Table S1. Complete $^1\text{H}$ and $^{13}\text{C}$ NMR resonance assignments for compounds <b>1</b> and <b>2</b> .....     | 34 |
| Table S2. Complete $^1\text{H}$ and $^{13}\text{C}$ NMR resonance assignments for compounds <b>4,5,6</b> and <b>7</b> ..... | 35 |
| Table S3. Complete $^1\text{H}$ and $^{13}\text{C}$ NMR resonance assignments for compound <b>3</b> .....                   | 37 |

## Spectra and spectral data on compound **1**

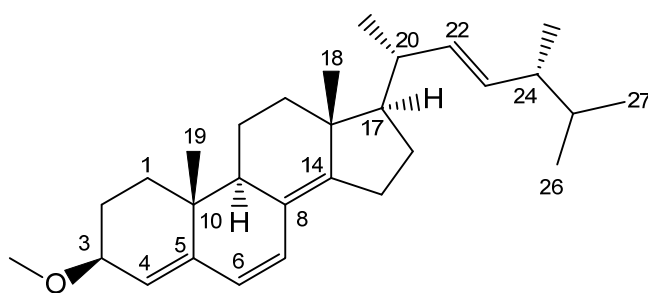

3 $\beta$ -methoxy-ergosta-6,8<sup>14</sup>,22-trien (**1**): amorphous solid;  $\alpha_D^{25}+87.8$  ( $c$  0.42, CHCl<sub>3</sub>, 25.4 °C); HRESIMS  $m/z$  377,31924 [ $M + H - CH_3OH$ ]<sup>+</sup> ( $\Delta$  2.2 ppm; C<sub>28</sub>H<sub>41</sub>); HRESI-MSMS (CID = 15%, 30%, 45%; rel int %)  $m/z$  293 (16), 251 (24).

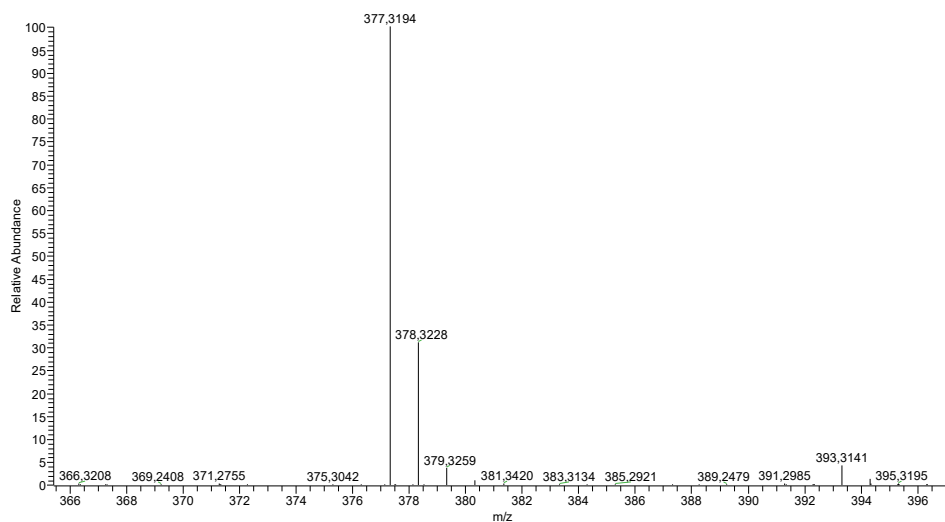

Figure S1. HRESI-MS spectrum of compound **1**

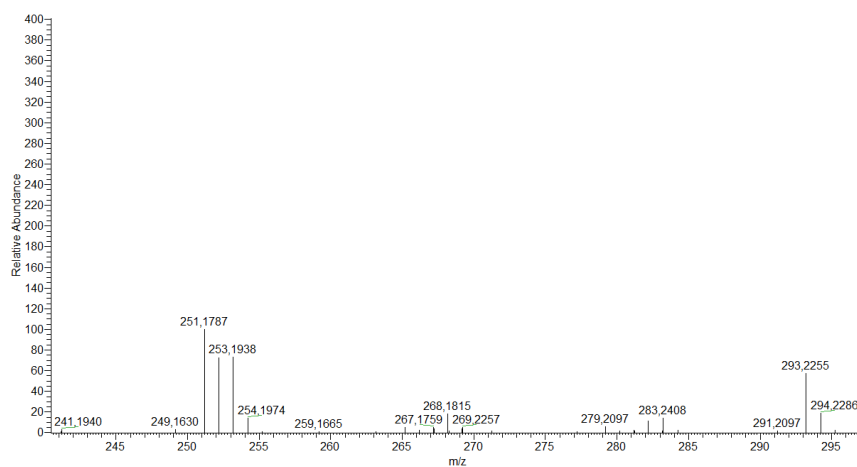

Figure S2. MS-MS spectrum of compound **1**

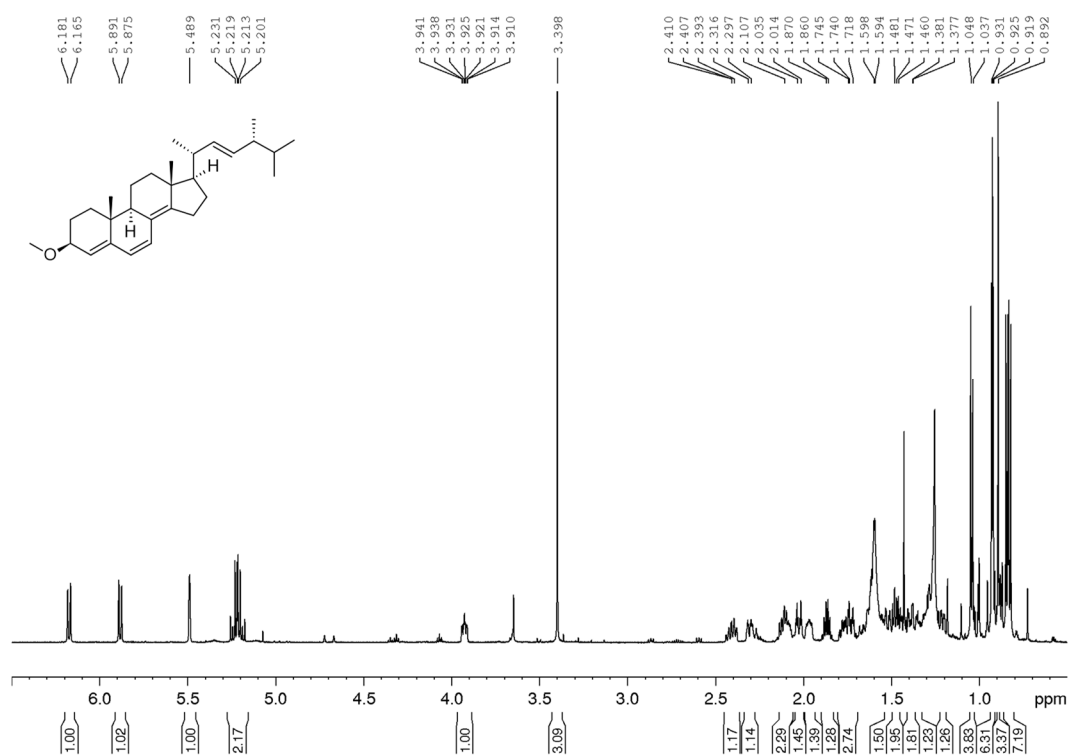

Figure S1. <sup>1</sup>H spectrum of compound **1** (600 MHz, CDCl<sub>3</sub>, 295 K)

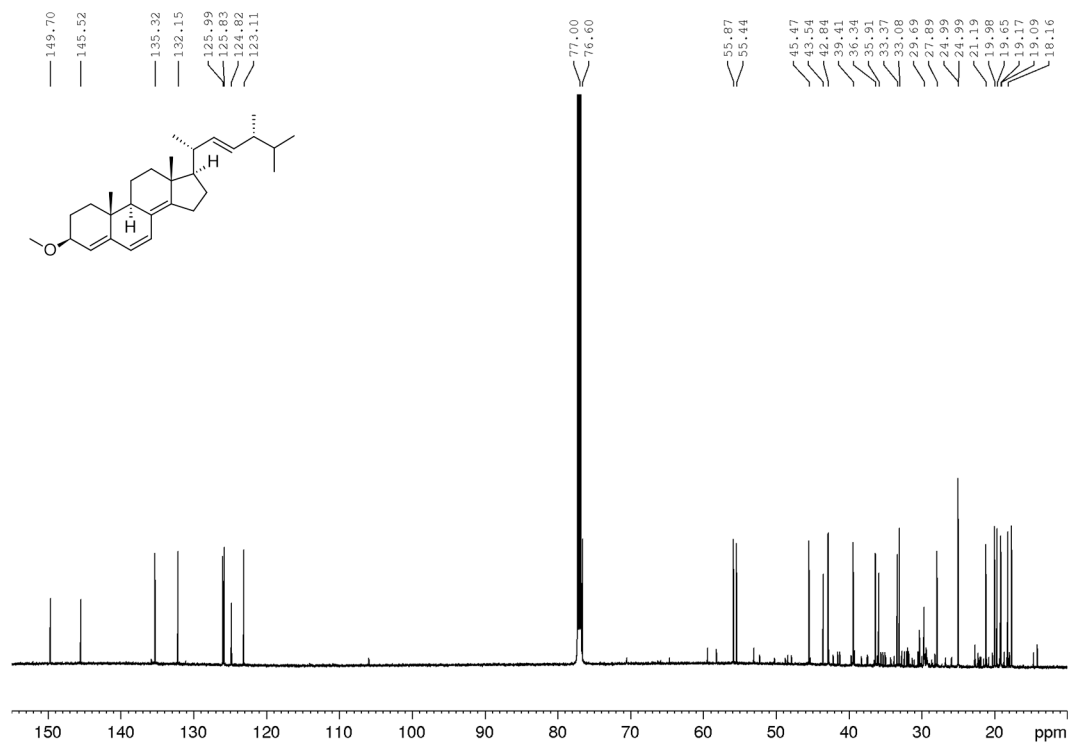

Figure S2. <sup>13</sup>C spectrum of compound **1** (150 MHz, CDCl<sub>3</sub>, 295 K)

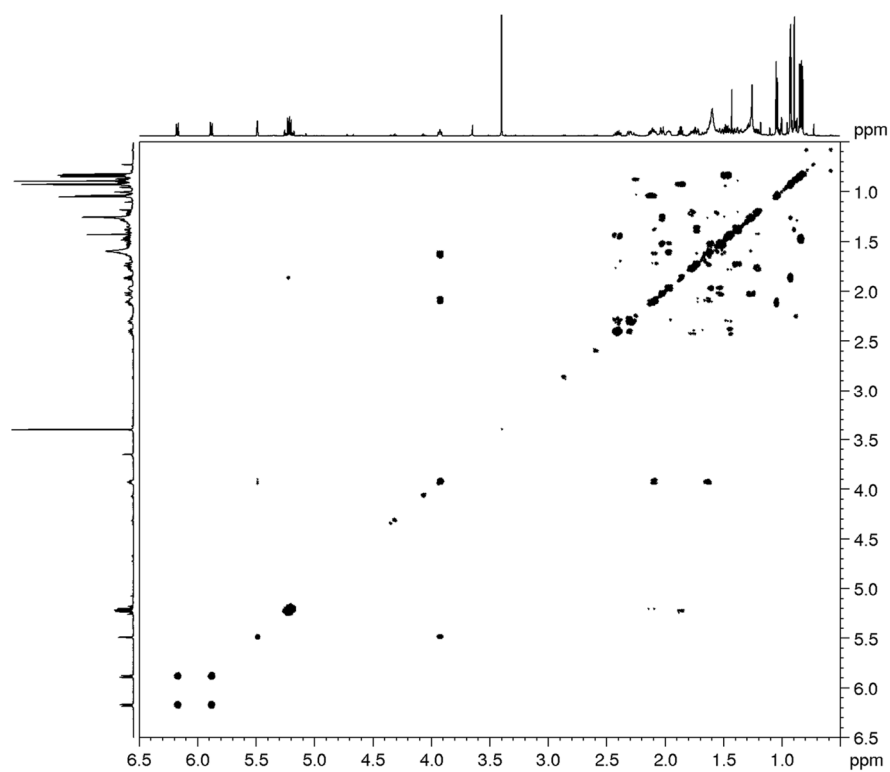

Figure S3. COSY spectrum of compound **1** (600 MHz, CDCl<sub>3</sub>, 295 K)

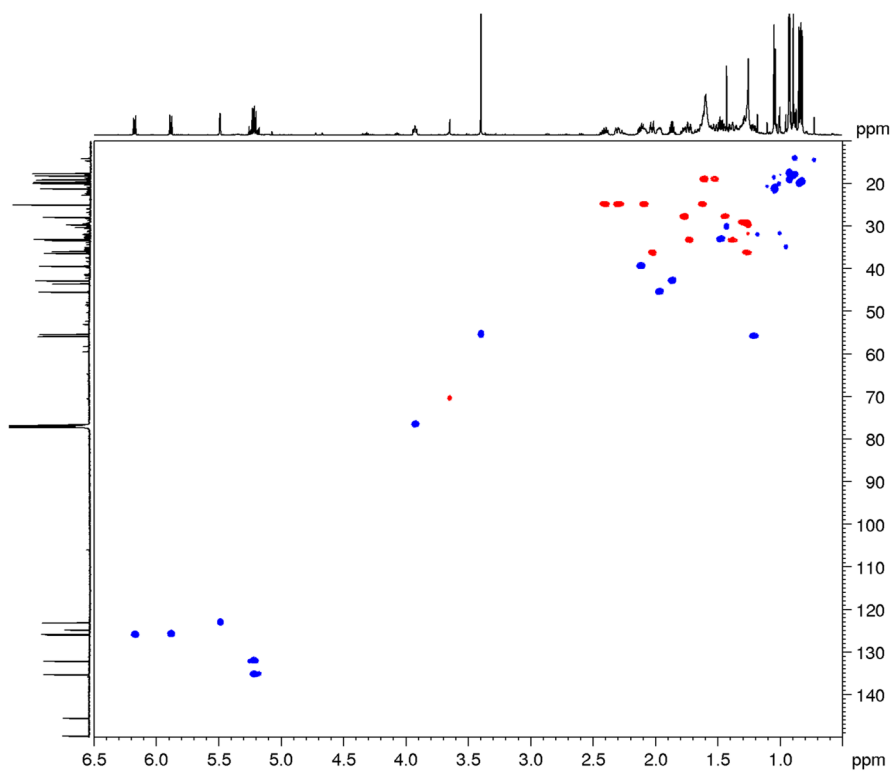

Figure S4. DEPT-edited HSQC spectrum of compound **1** (600 MHz, CDCl<sub>3</sub>, 295 K)

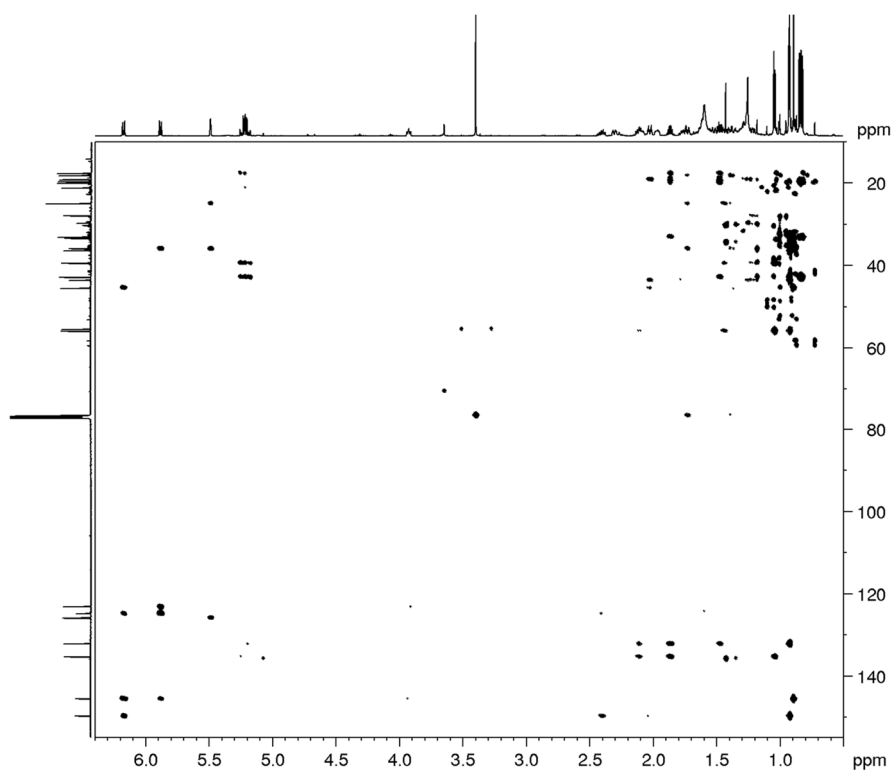

Figure S5. HMBC spectrum of compound **1** (600 MHz, CDCl<sub>3</sub>, 295 K)

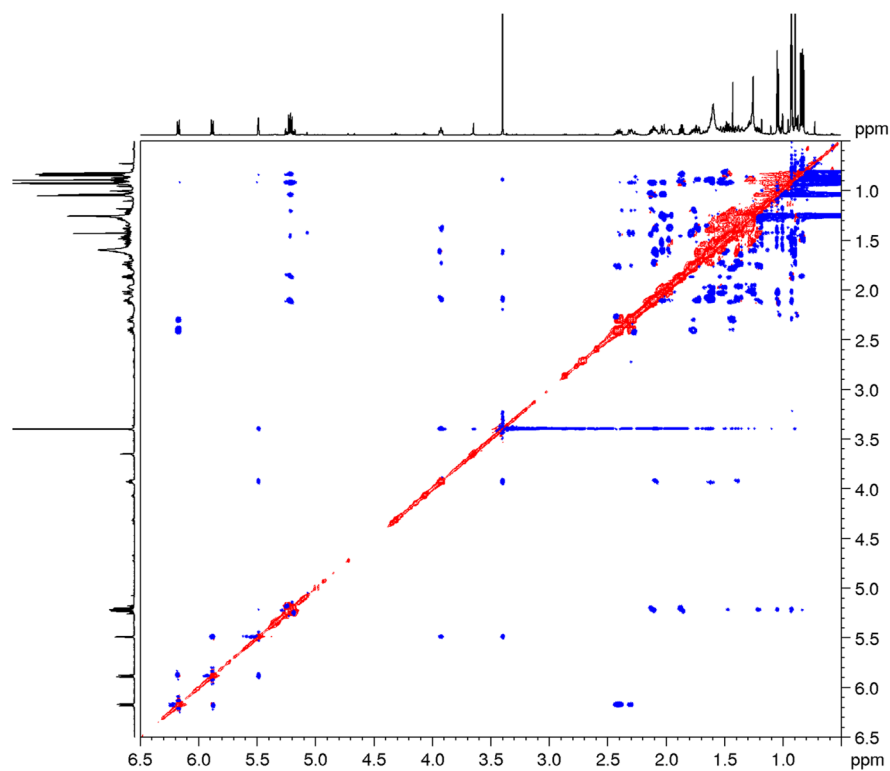

Figure S6. ROESY spectrum of compound **1** (600 MHz, CDCl<sub>3</sub>, 295 K)

## Spectra and spectral data on compound **2**

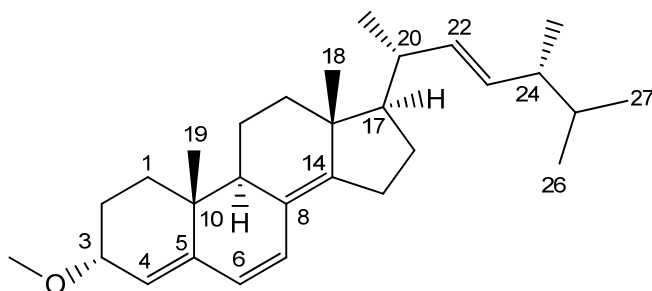

3 $\alpha$ -methoxy-ergosta-6,8<sup>14</sup>,22-trien (**2**): amorphous solid;  $\alpha_D^{25}$  -10.0 (*c* 0.09, CHCl<sub>3</sub>, 25.5 °C); HRESIMS *m/z* 377,3194 [M + H - CH<sub>3</sub>OH]<sup>+</sup> ( $\Delta$  2.2 ppm; C<sub>28</sub>H<sub>41</sub>); HRESI-MSMS (CID = 15%, 30%, 45%; rel int %) *m/z* .293, 251.

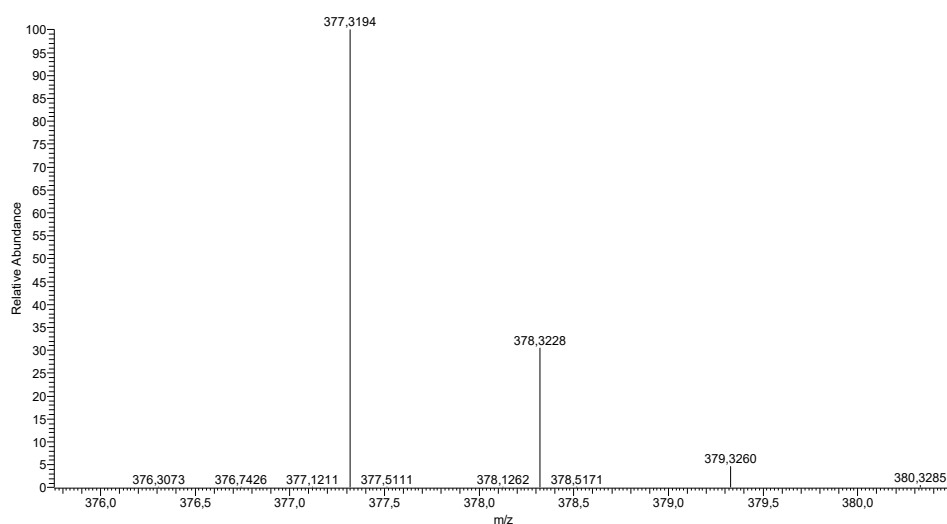

Figure S9. HRESI-MS spectrum of compound **2**

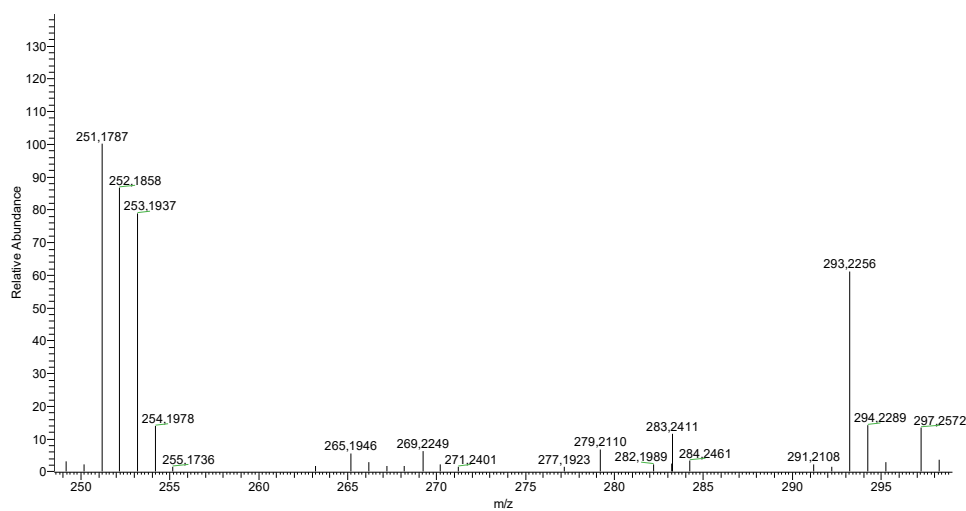

Figure S10. MS-MS spectrum of compound **2**



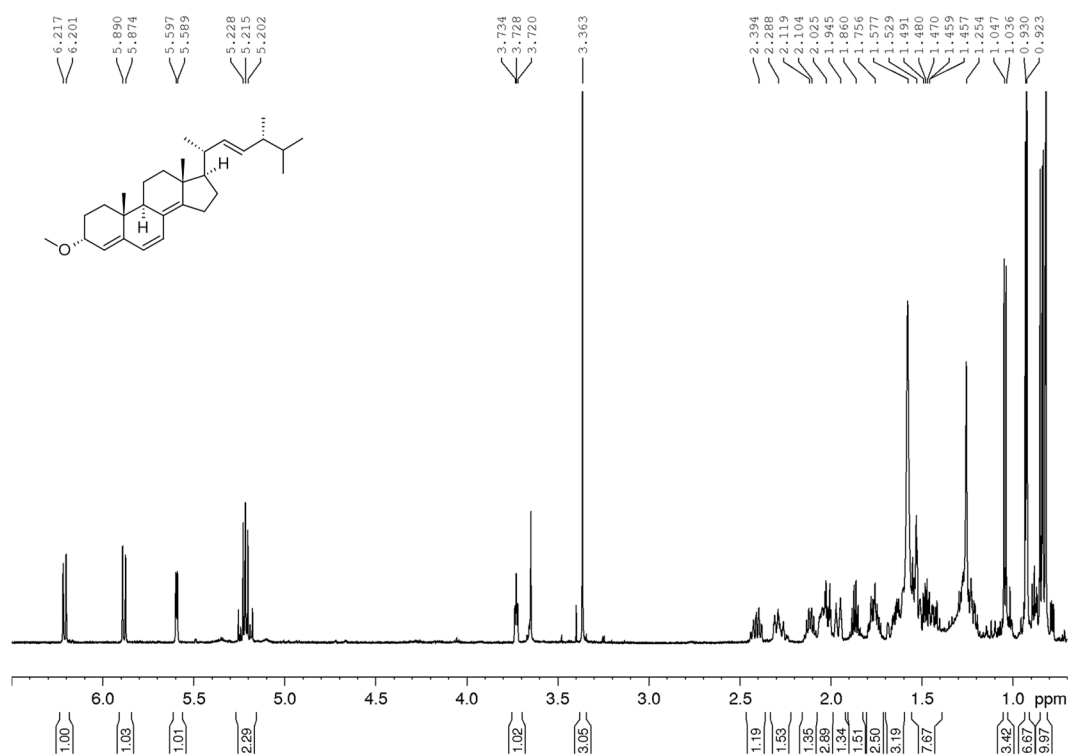

Figure S7. <sup>1</sup>H spectrum of compound **2** (600 MHz, CDCl<sub>3</sub>, 295 K)

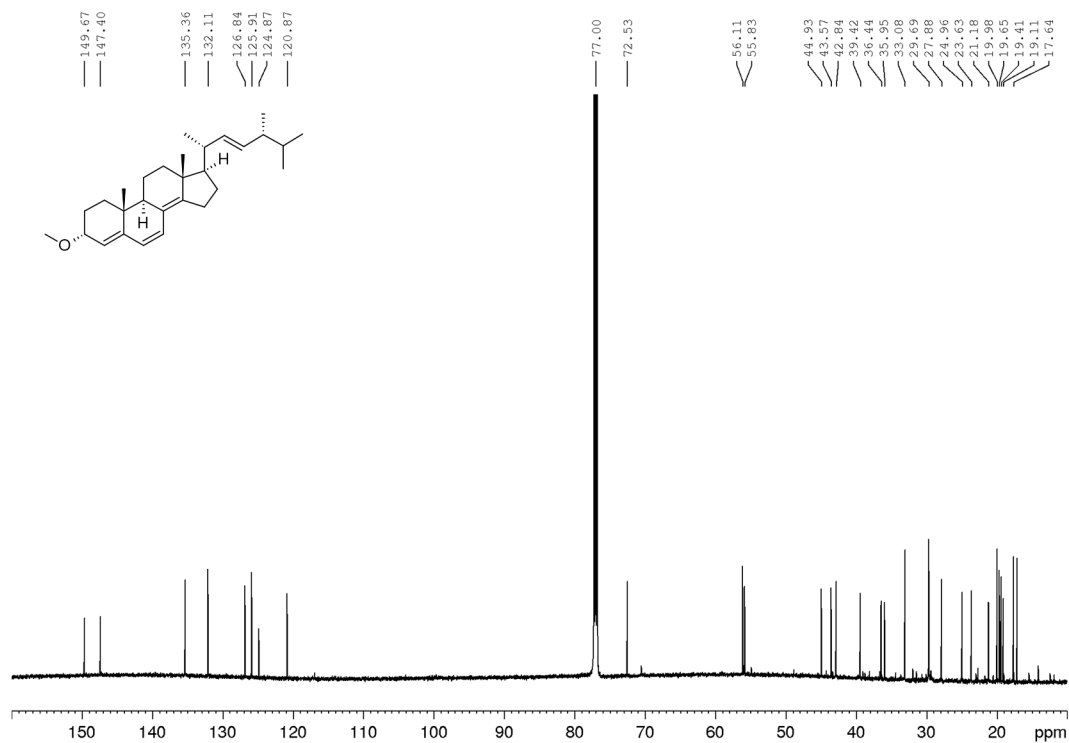

Figure S8. <sup>13</sup>C spectrum of compound **2** (150 MHz, CDCl<sub>3</sub>, 295 K)

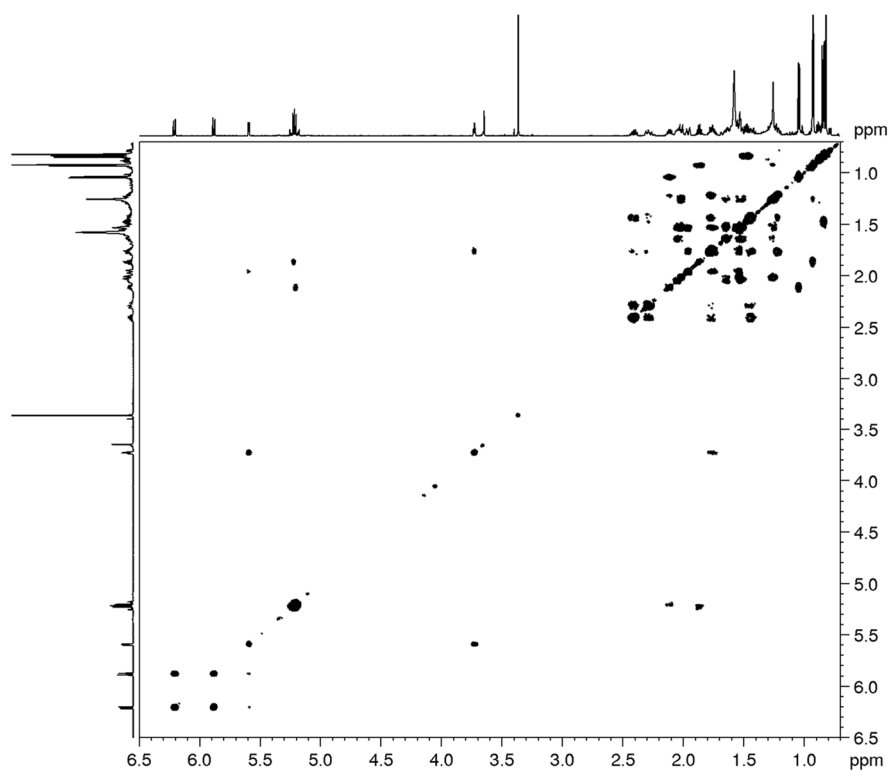

Figure S9. COSY spectrum of compound **2** (600 MHz, CDCl<sub>3</sub>, 295 K)

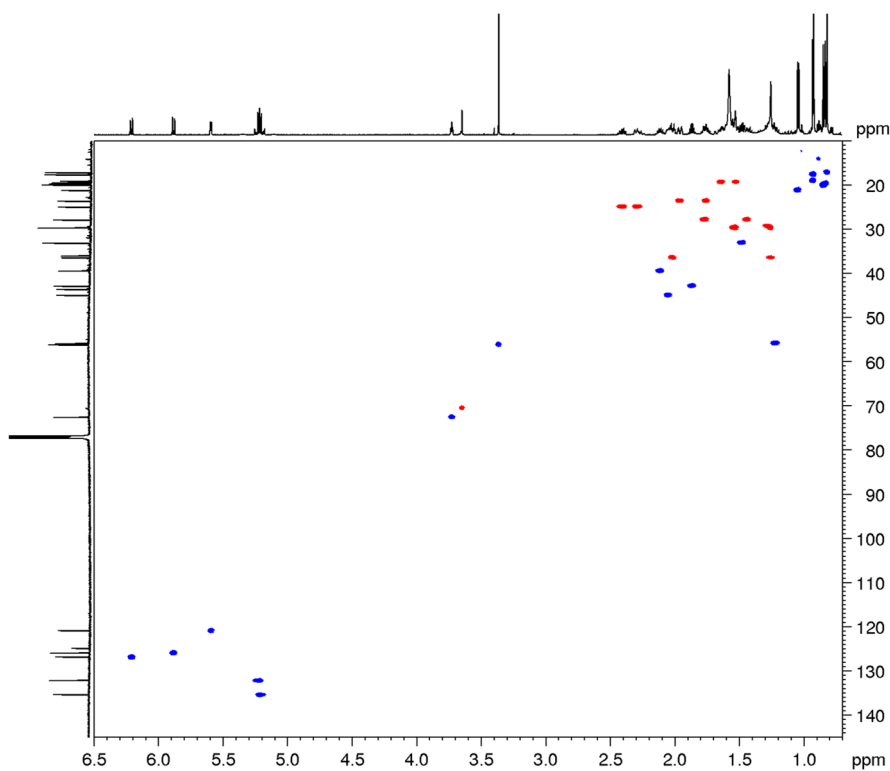

Figure S10. DEPT-edited HSQC spectrum of compound **2** (600 MHz, CDCl<sub>3</sub>, 295 K)

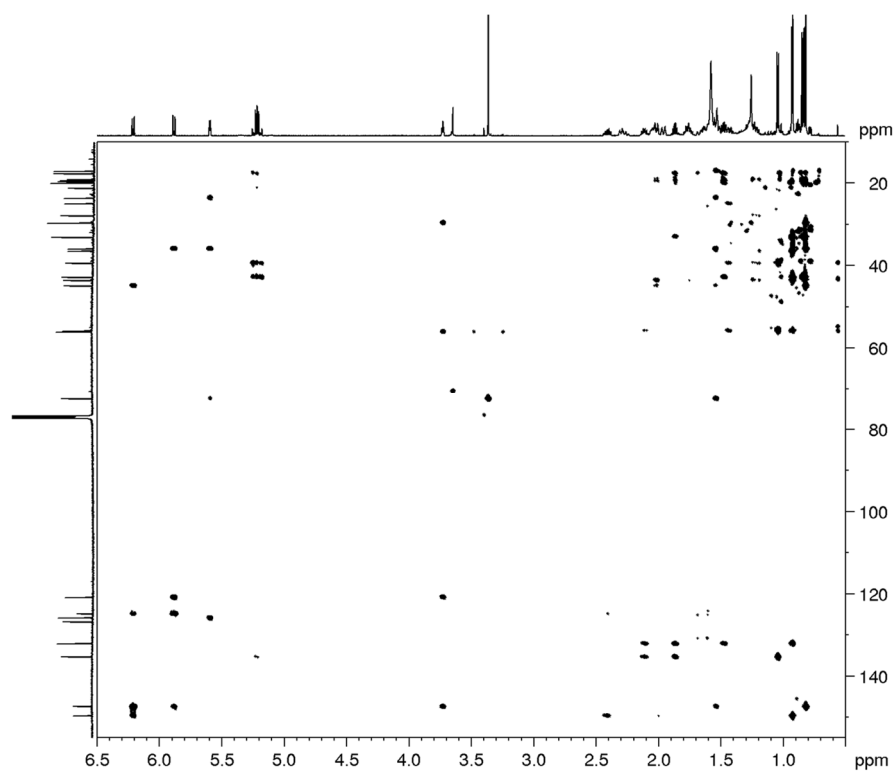

Figure S11. HMBC spectrum of compound **2** (600 MHz, CDCl<sub>3</sub>, 295 K)

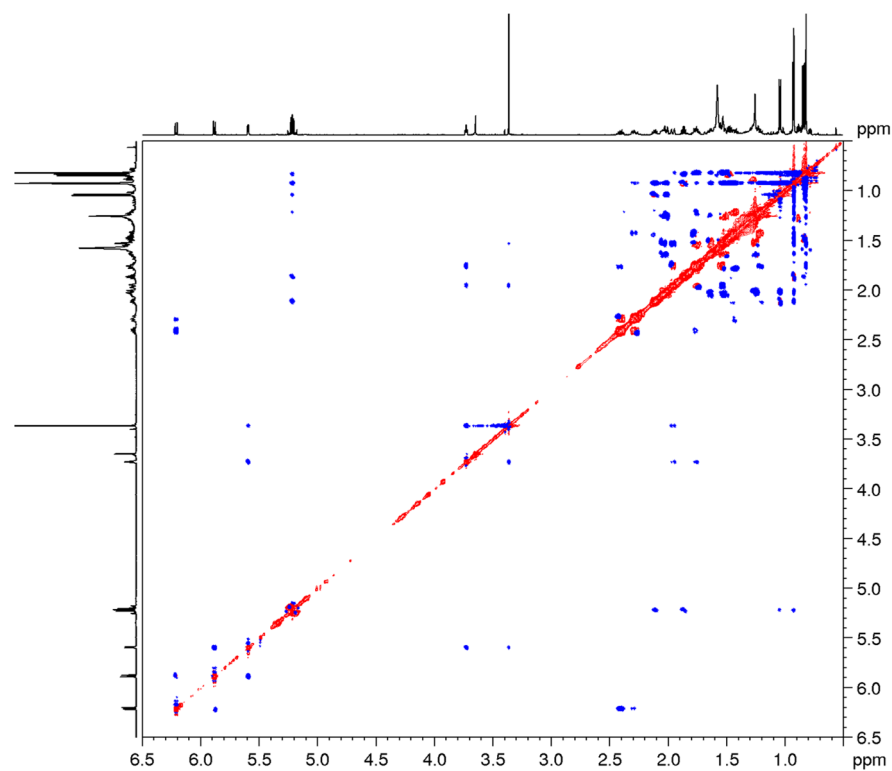

Figure S12. ROESY spectrum of compound **2** (600 MHz, CDCl<sub>3</sub>, 295 K)

## Spectra and spectral data on compound 3

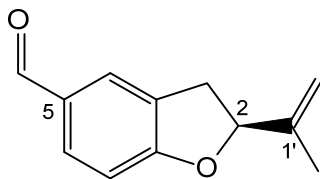

Fomannoxin (3): amorphous solid; HRESIMS  $m/z$  189,09061  $[M + H]^+$  ( $\Delta$  2.1 ppm;  $C_{12}H_{13}O_2$ ); HRESI-MSMS (CID = 15%, 30%, 45%; rel int %)  $m/z$  161 (97), 143 (23), 133 (33).

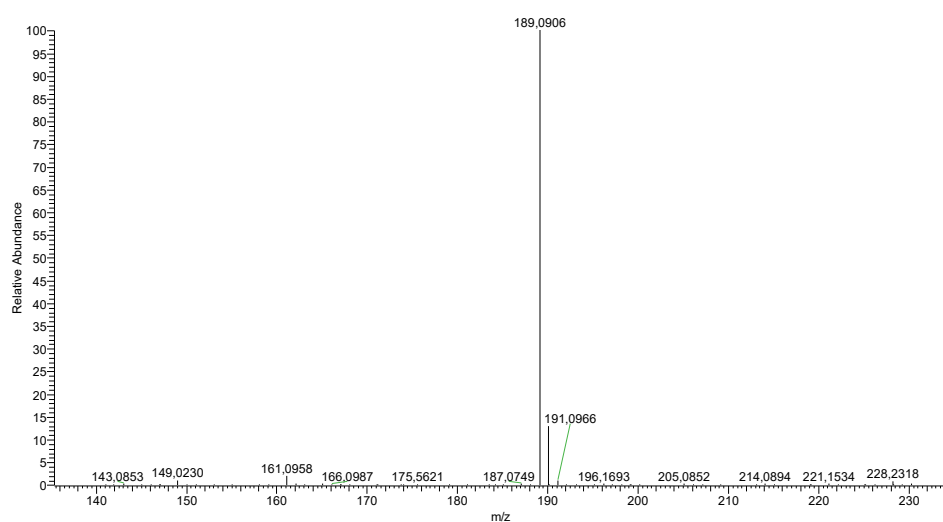

Figure S13. HRESI-MS spectrum of compound 3

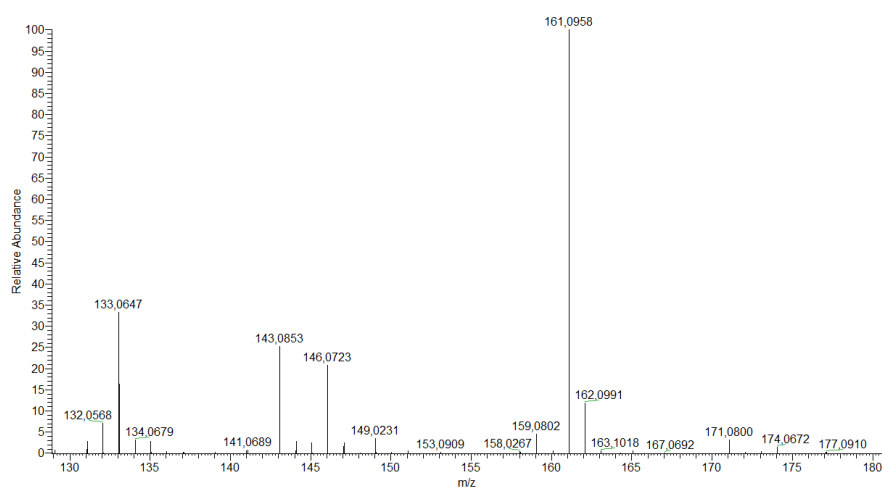

Figure S14. MS-MS spectrum of compound 3

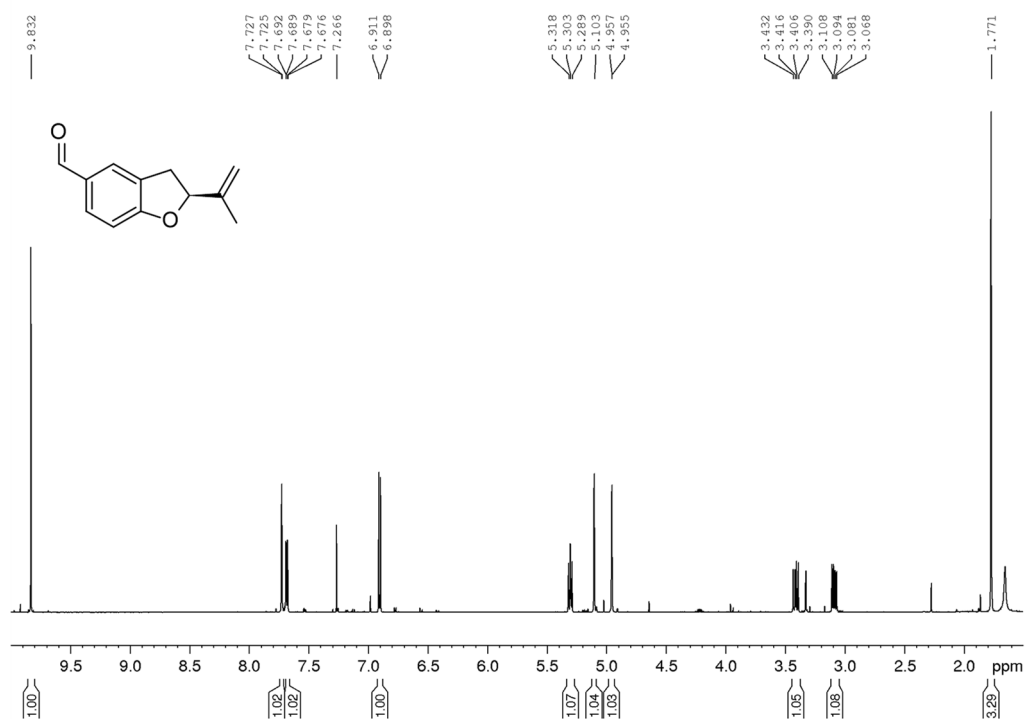

Figure S15. <sup>1</sup>H spectrum of compound 3 (600 MHz, CDCl<sub>3</sub>, 295 K)

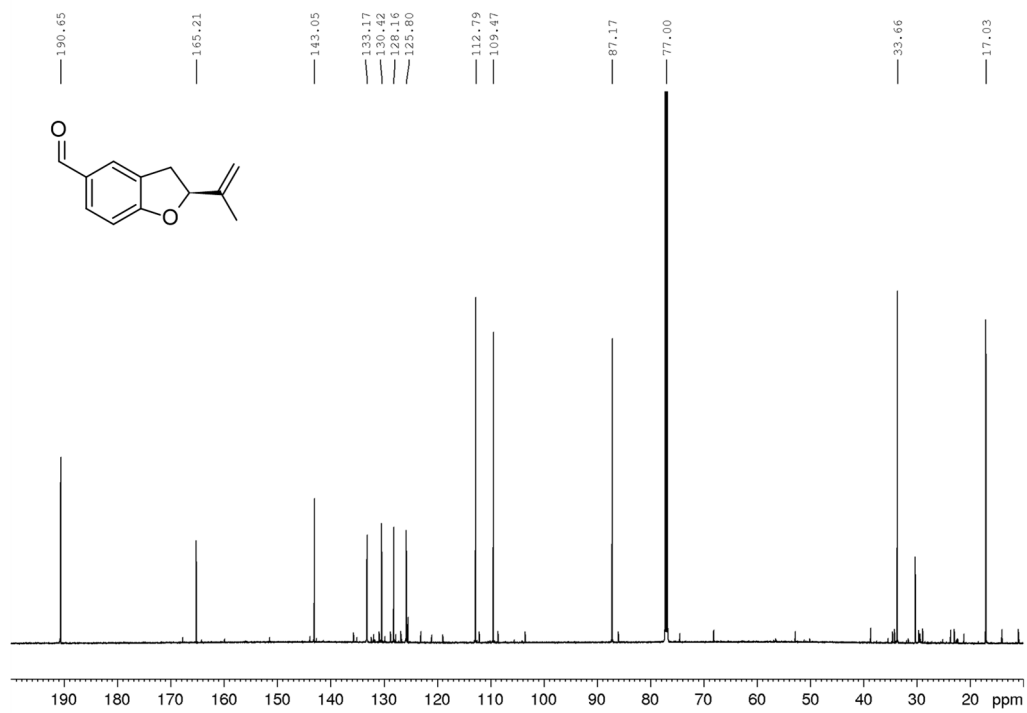

Figure S16. <sup>13</sup>C spectrum of compound 3 (150 MHz, CDCl<sub>3</sub>, 295 K)

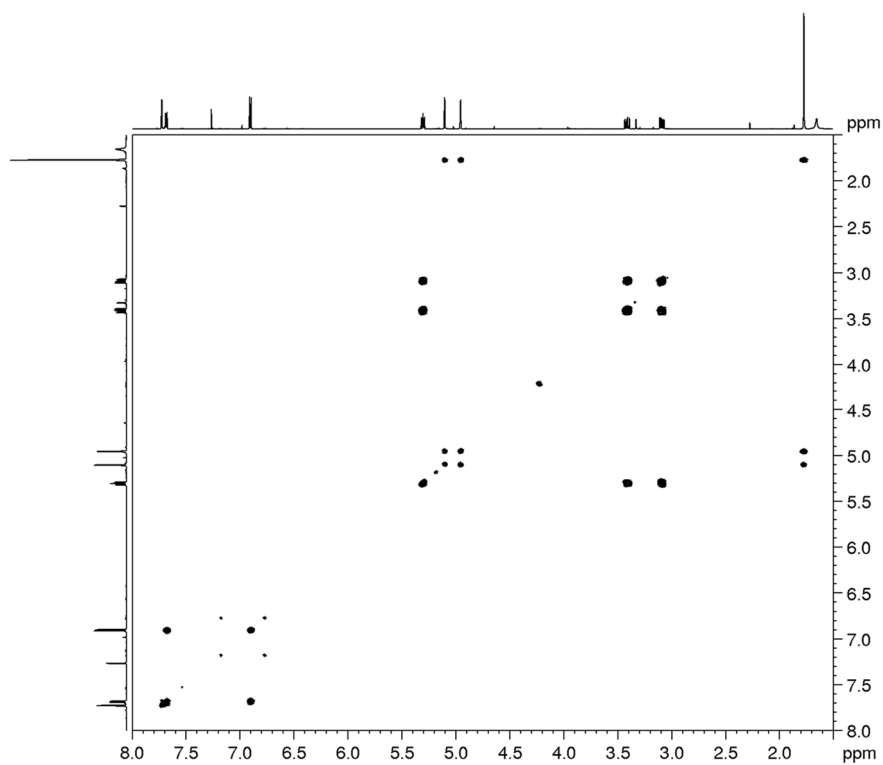

Figure S17. COSY spectrum of compound **3** (600 MHz, CDCl<sub>3</sub>, 295 K)

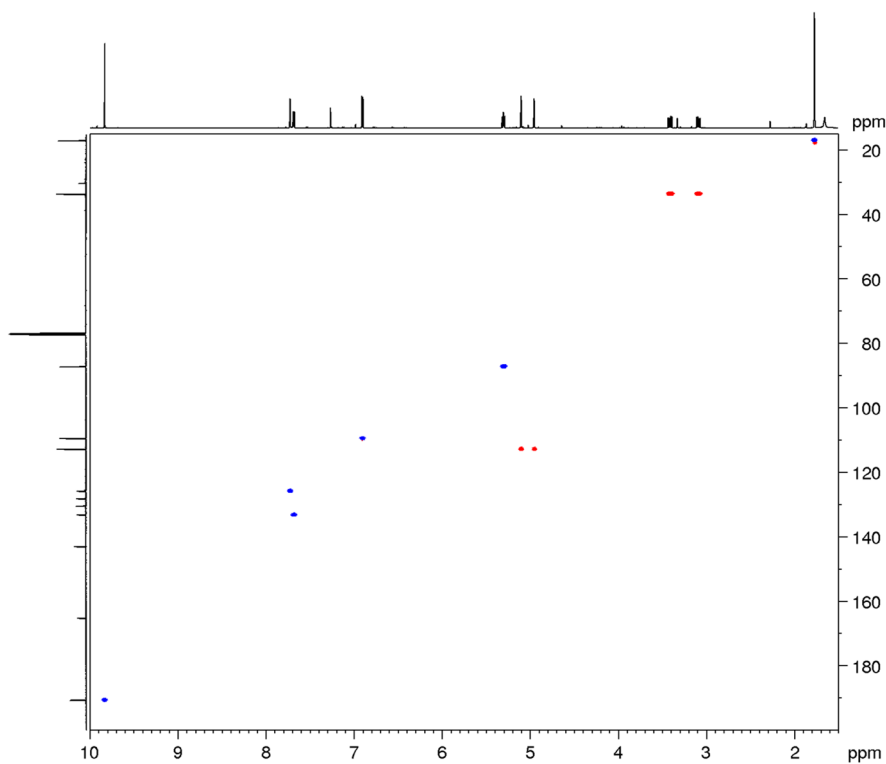

Figure S18. DEPT-edited HSQC spectrum of compound **3** (600 MHz, CDCl<sub>3</sub>, 295 K)

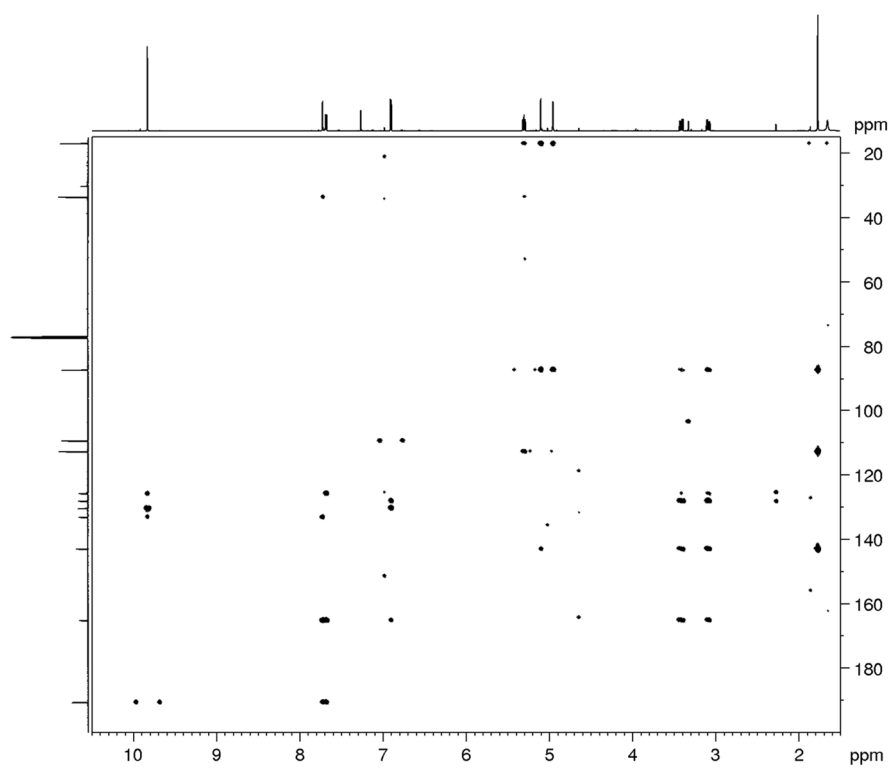

Figure S19. HMBC spectrum of compound **3** (600 MHz,  $\text{CDCl}_3$ , 295 K)

## Spectra and spectral data on compound 4

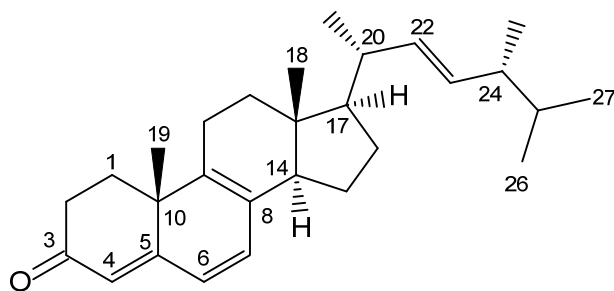

Ergosta-4,6,8[9]22-tetraene-3-one (4): amorphous solid; HRESIMS  $m/z$  393.31458  $[M + H]^+$  ( $\Delta$  1.6 ppm;  $C_{28}H_{44}O$ ); HRESI-MSMS (CID = 15%, 30%, 45%; rel int %)  $m/z$  268 (54).

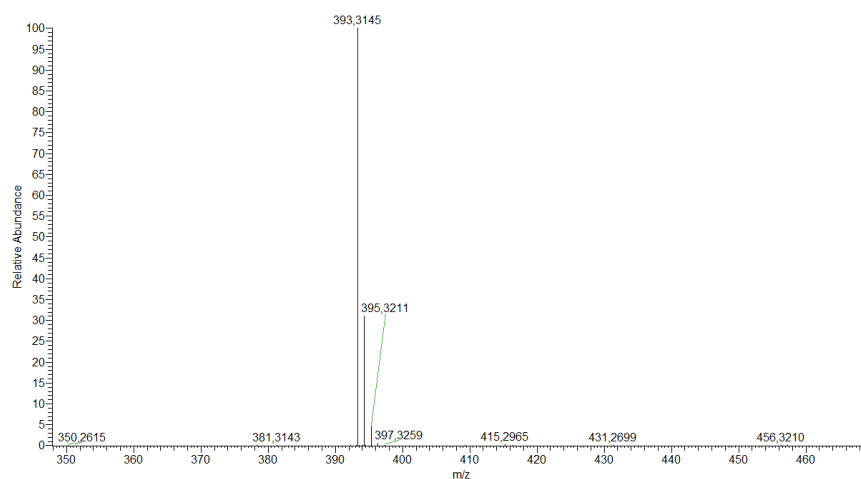

Figure S20. HRESI-MS spectrum of compound 4

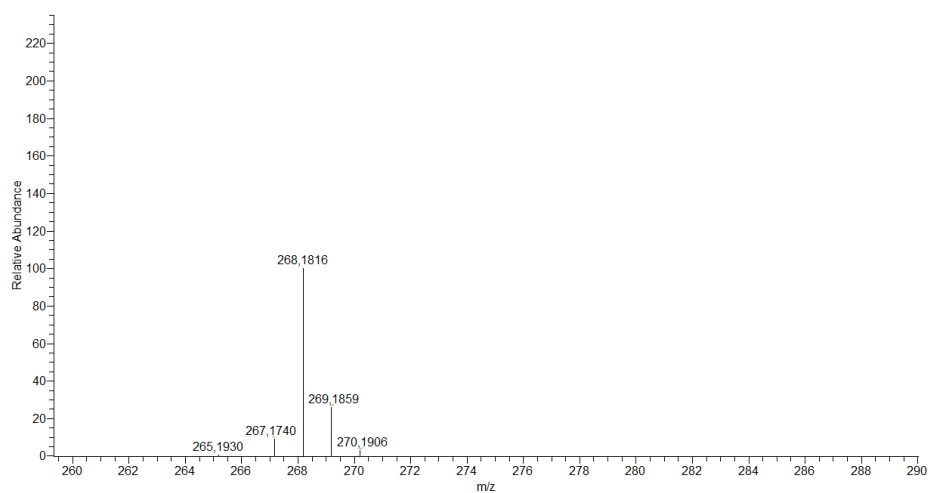

Figure S21. MS-MS spectrum of compound 4



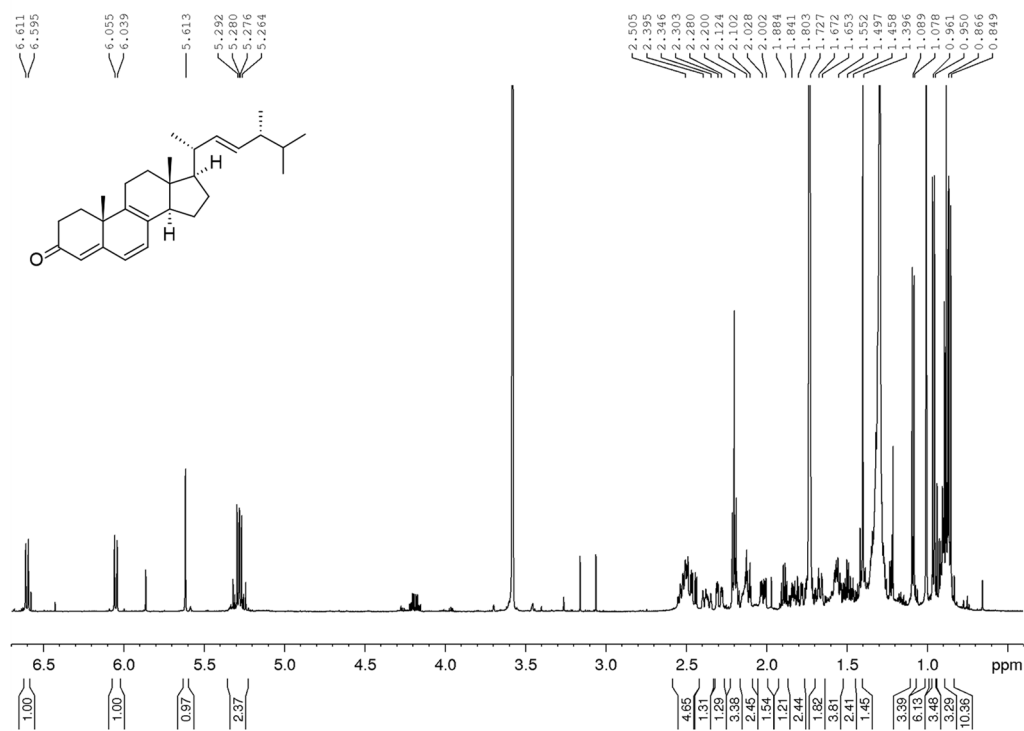

Figure S22. <sup>1</sup>H spectrum of compound 4 (600 MHz, THF-*d*<sub>8</sub>, 295 K)

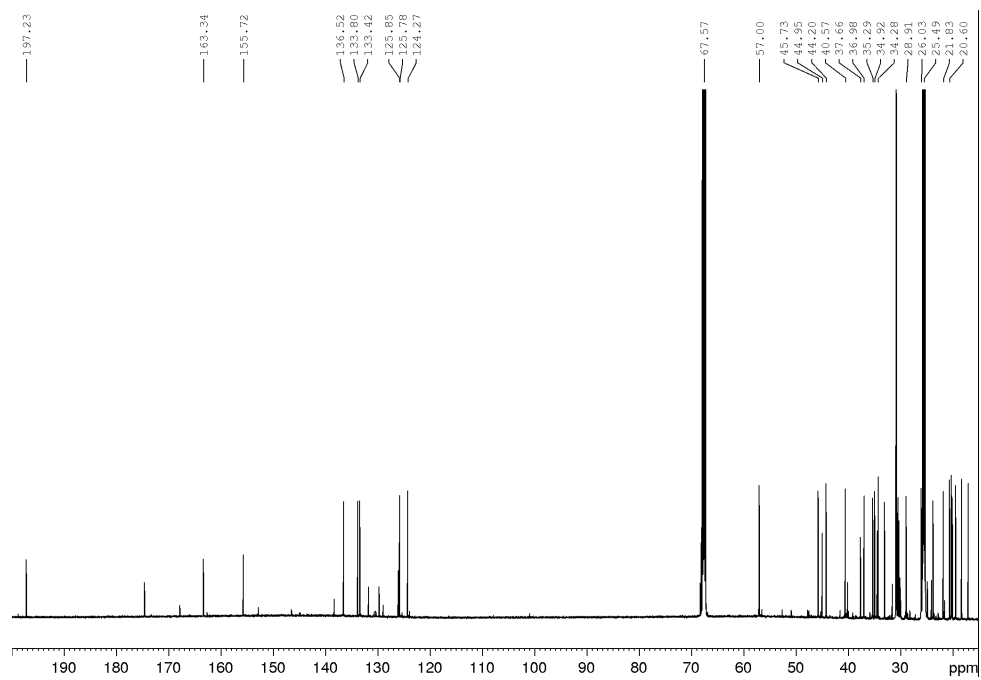

Figure S23. <sup>13</sup>C spectrum of compound 4 (150 MHz, THF-*d*<sub>8</sub>, 295 K)

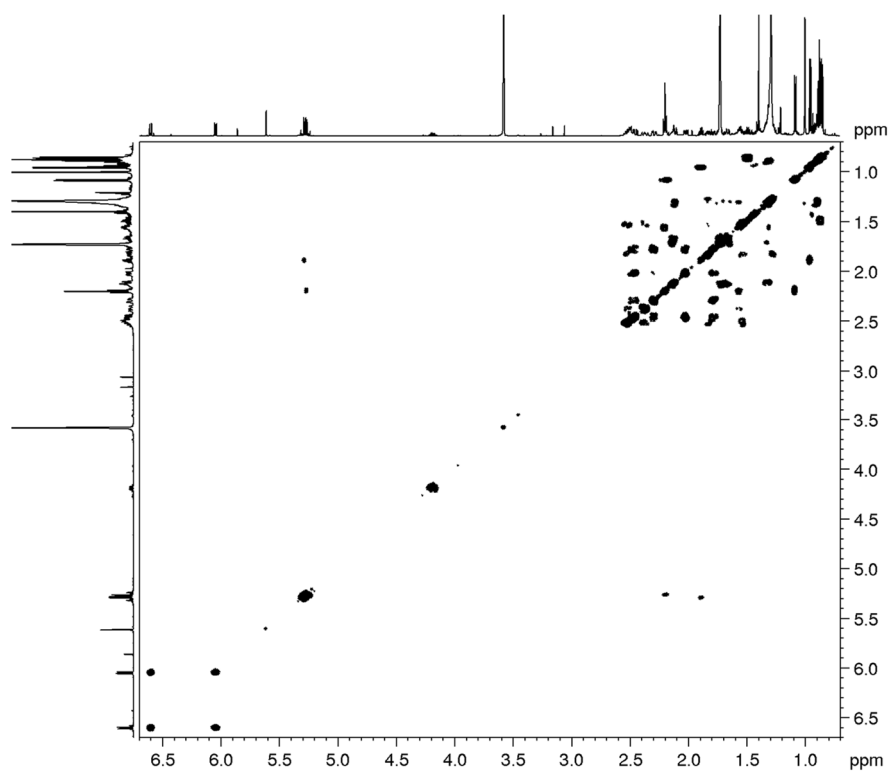

Figure S24. COSY spectrum of compound **4** (600 MHz, THF-*d*<sub>8</sub>, 295 K)

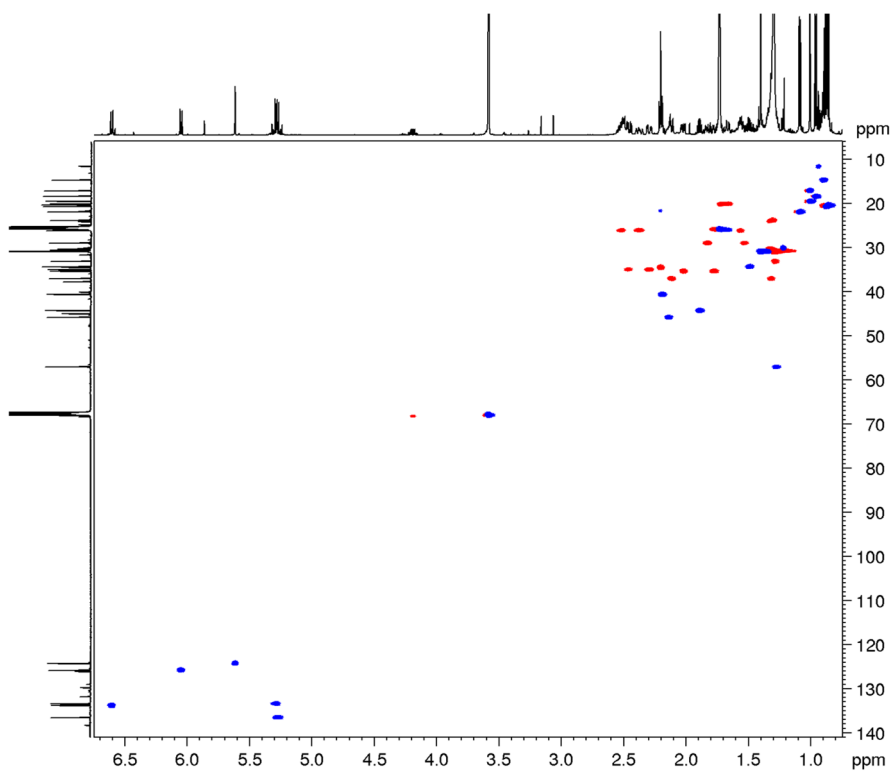

Figure S25. DEPT-edited HSQC spectrum of compound **4** (600 MHz, THF-*d*<sub>8</sub>, 295 K)

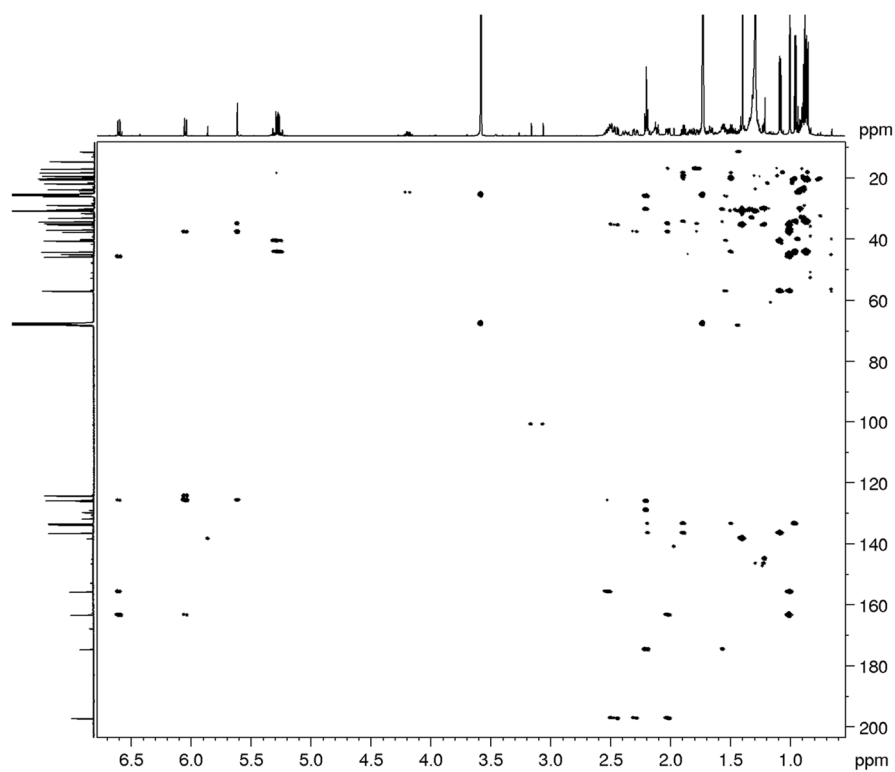

Figure S26. HMBC spectrum of compound **4** (600 MHz,  $\text{THF-}d_8$ , 295 K)

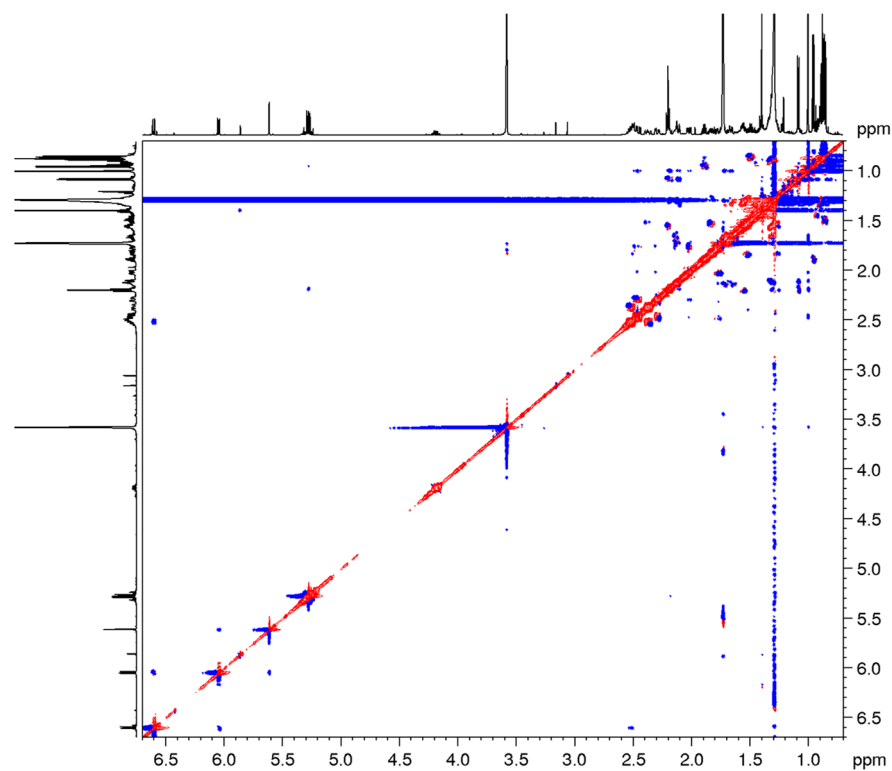

Figure S27. ROESY spectrum of compound **4** (600 MHz,  $\text{THF-}d_8$ , 295 K)

## Spectra and spectral data on compound 5

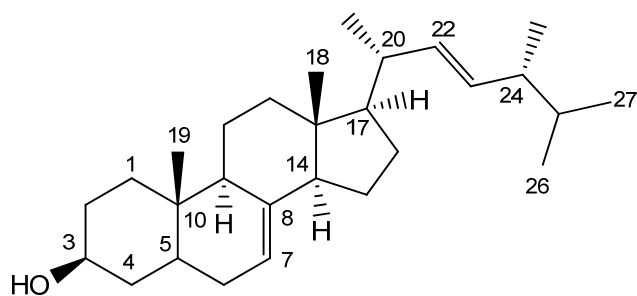

Ergosta-7,22-diene-3-ol (5): amorphous solid; HRESIMS m/z no evaluable data.

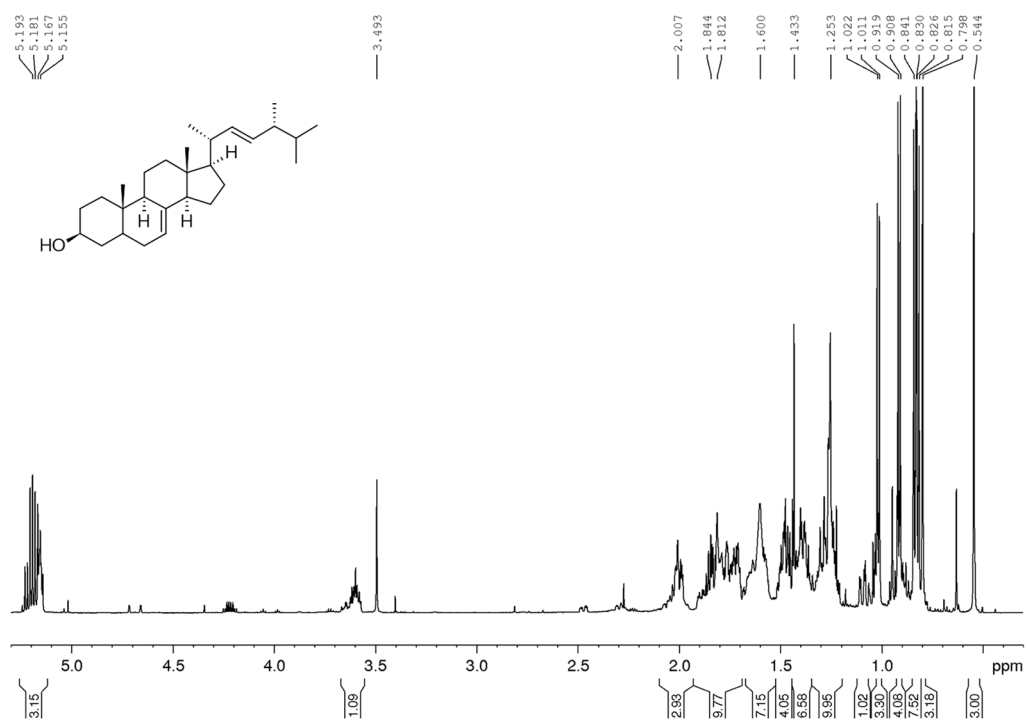

Figure S28.  $^1\text{H}$  spectrum of compound 5 (600 MHz,  $\text{CDCl}_3$ , 295 K)

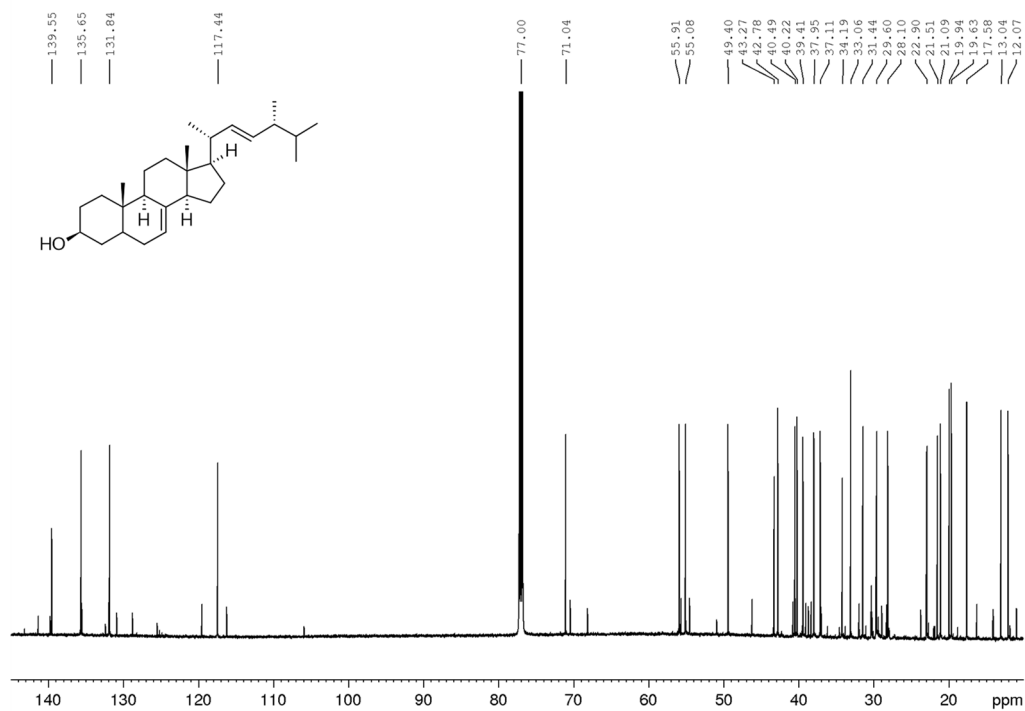

Figure S29. <sup>13</sup>C spectrum of compound 5 (150 MHz, CDCl<sub>3</sub>, 295 K)

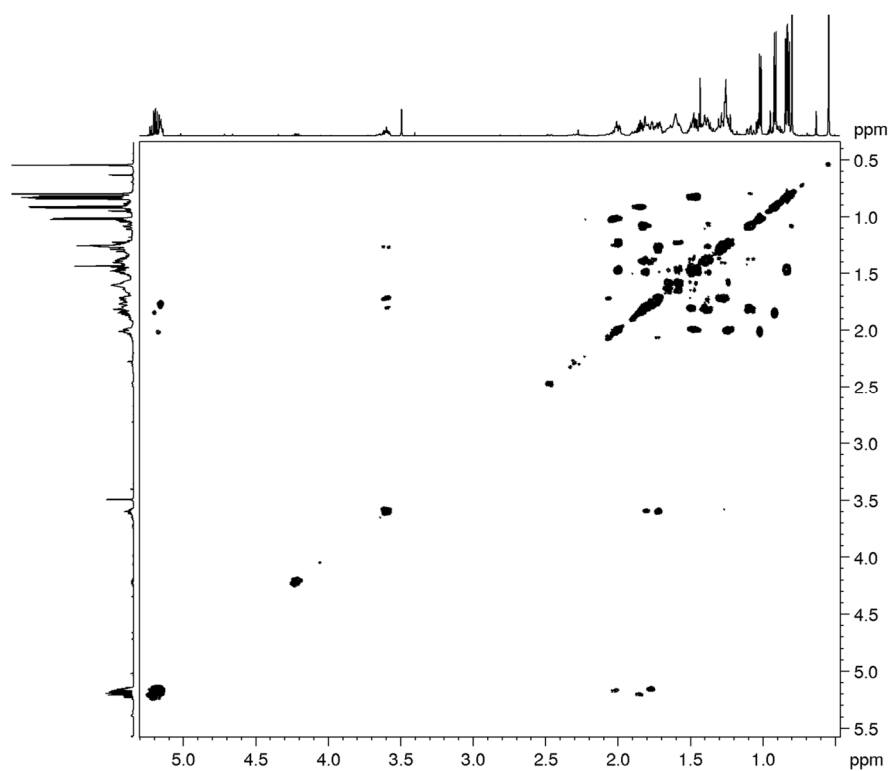

Figure S30. COSY spectrum of compound 5 (600 MHz, CDCl<sub>3</sub>, 295 K)

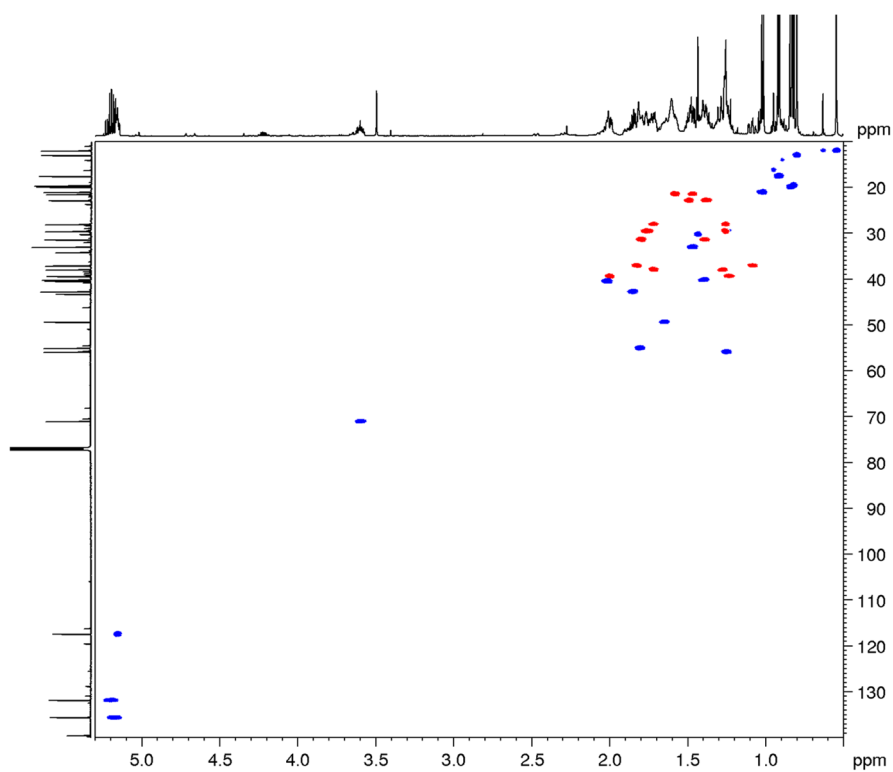

Figure S31. DEPT-edited HSQC spectrum of compound **5** (600 MHz, CDCl<sub>3</sub>, 295 K)

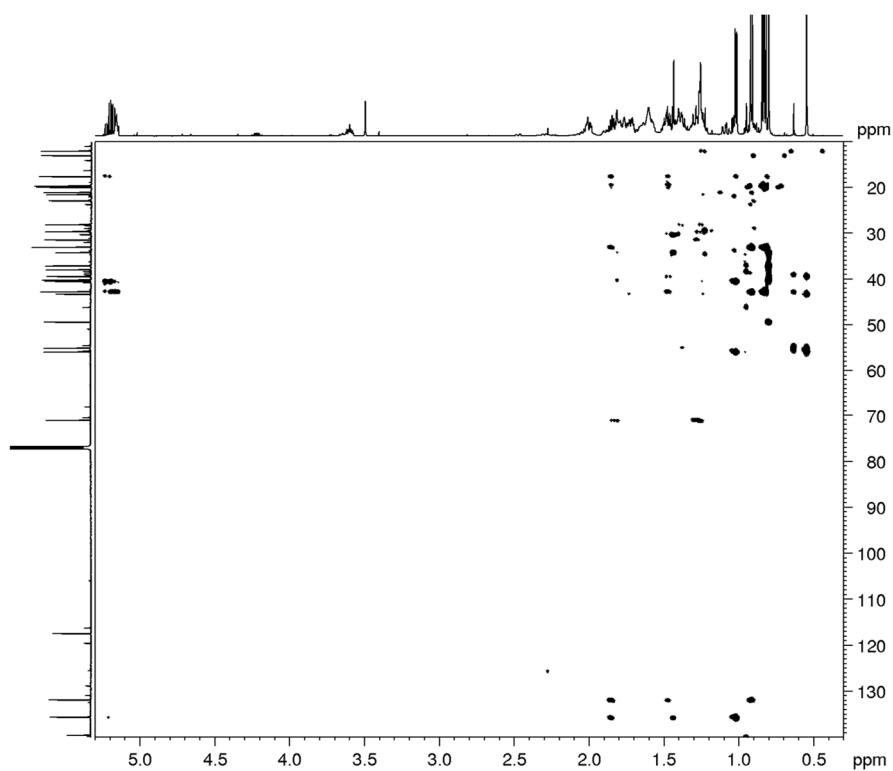

Figure S32. HMBC spectrum of compound **5** (600 MHz, CDCl<sub>3</sub>, 295 K)

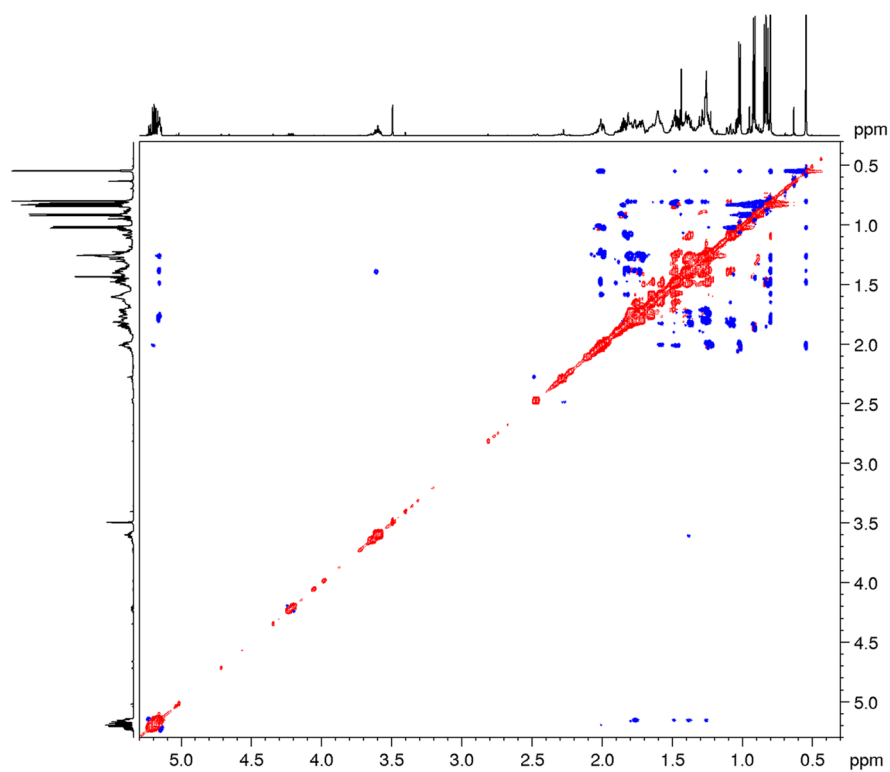

Figure S33. ROESY spectrum of compound **5** (600 MHz, CDCl<sub>3</sub>, 295 K)

## Spectra and spectral data on compound 6

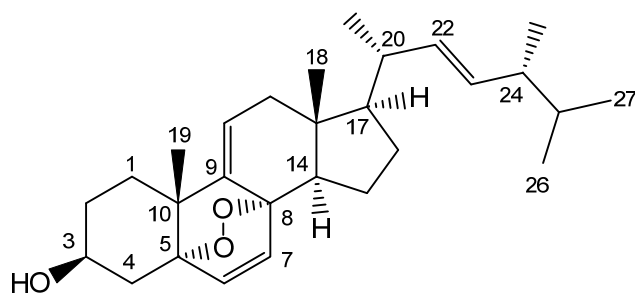

9,11-Dehydroergosterol peroxide (6): amorphous solid; HRESIMS  $m/z$  427.32028  $[M + H]^+$  ( $\Delta$  1.1 ppm;  $C_{28}H_{43}O_3$ ); HRESI-MSMS (CID = 15%, 30%, 45%; rel int %)  $m/z$  409(16), 391 (7), 375 (100).

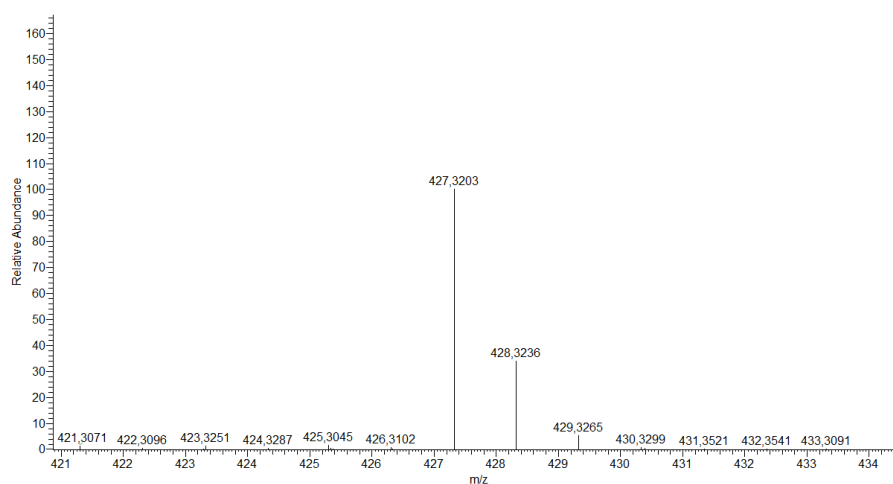

Figure S34. HRESI-MS spectrum of compound 6

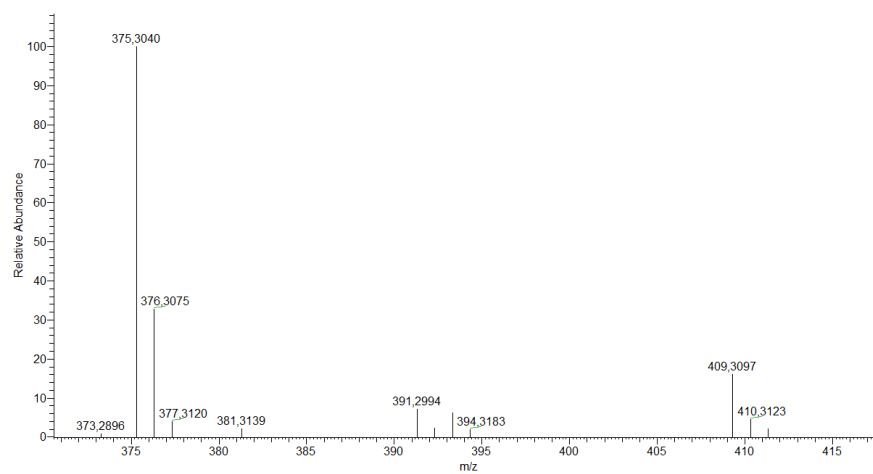

Figure S35. MS-MS spectrum of compound 6



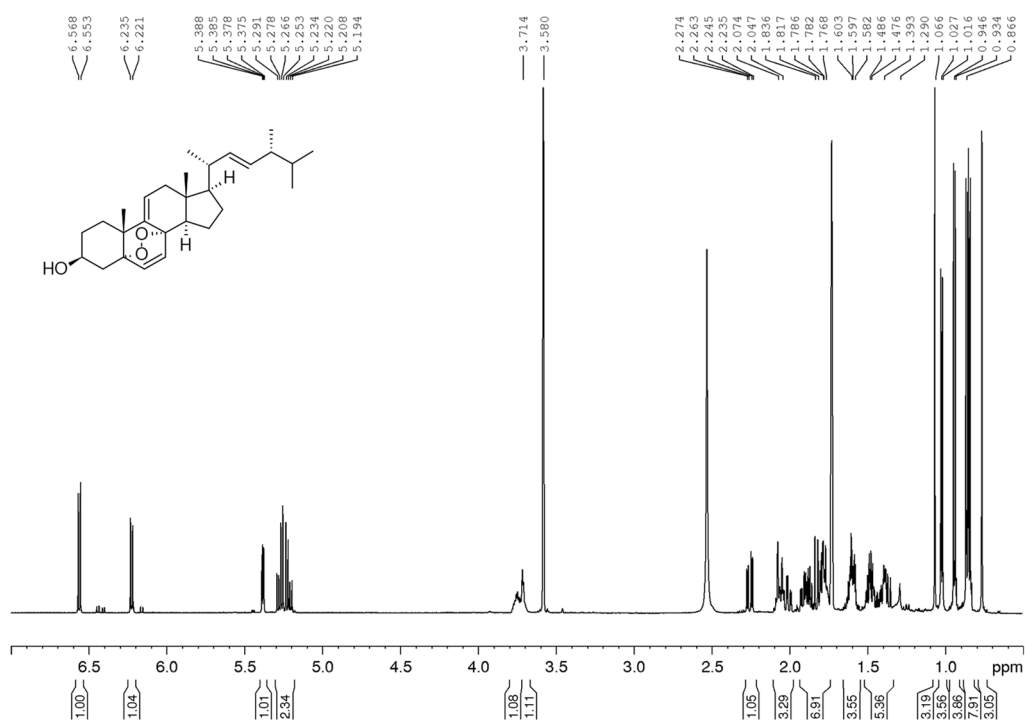

Figure S36. <sup>1</sup>H spectrum of compound 6 (600 MHz, THF-*d*<sub>8</sub>, 295 K)

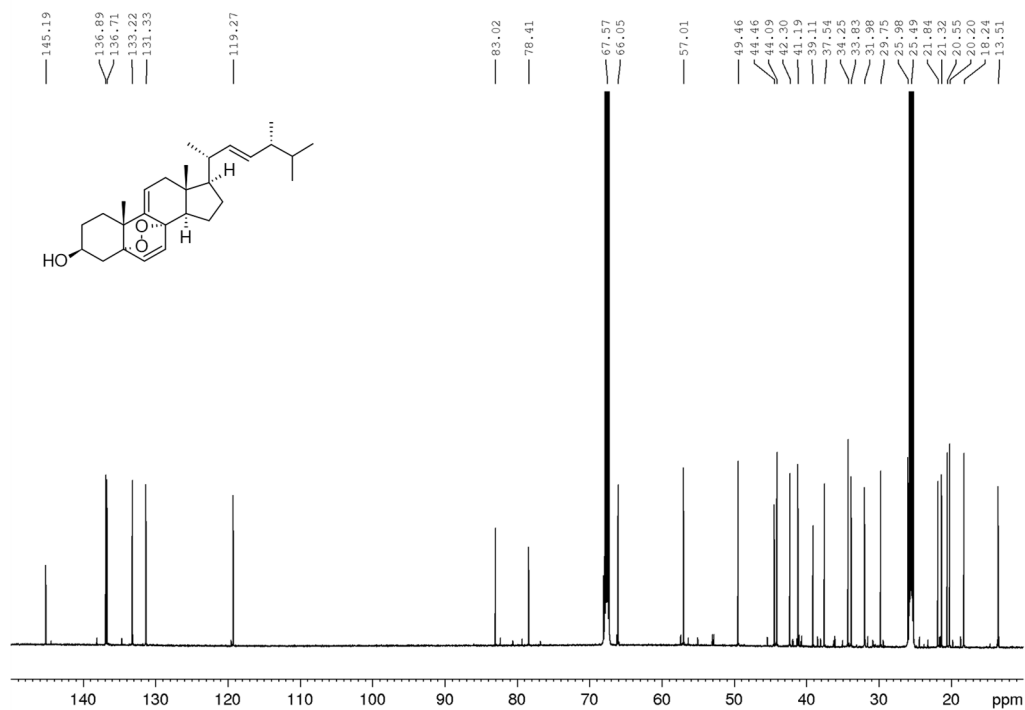

Figure S37. <sup>13</sup>C spectrum of compound 6 (150 MHz, THF-*d*<sub>8</sub>, 295 K)

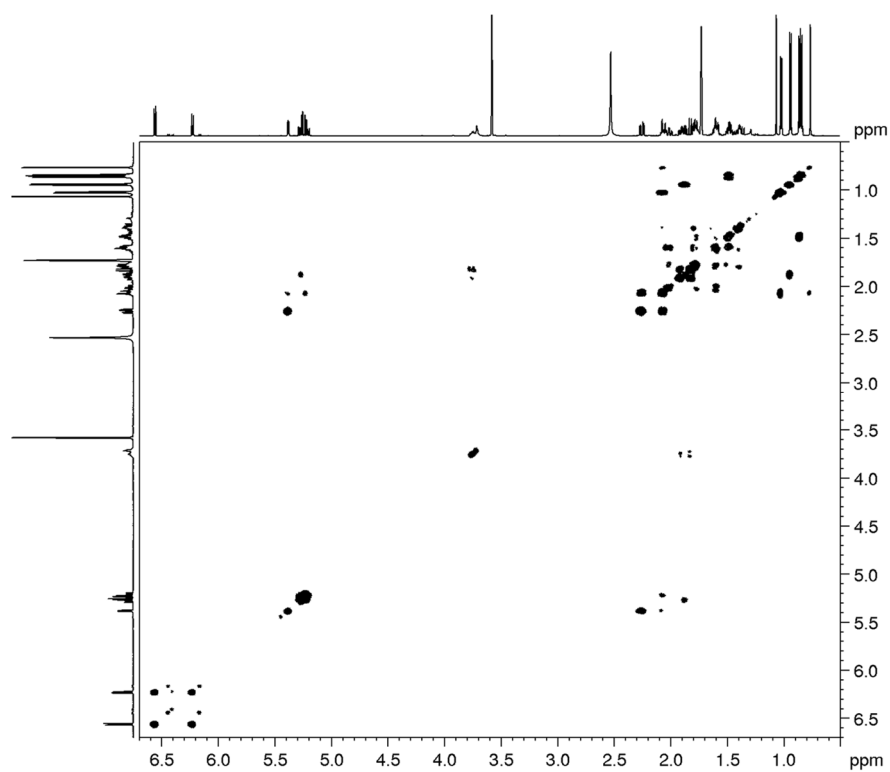

Figure S38. COSY spectrum of compound **6** (600 MHz, THF-*d*<sub>8</sub>, 295 K)

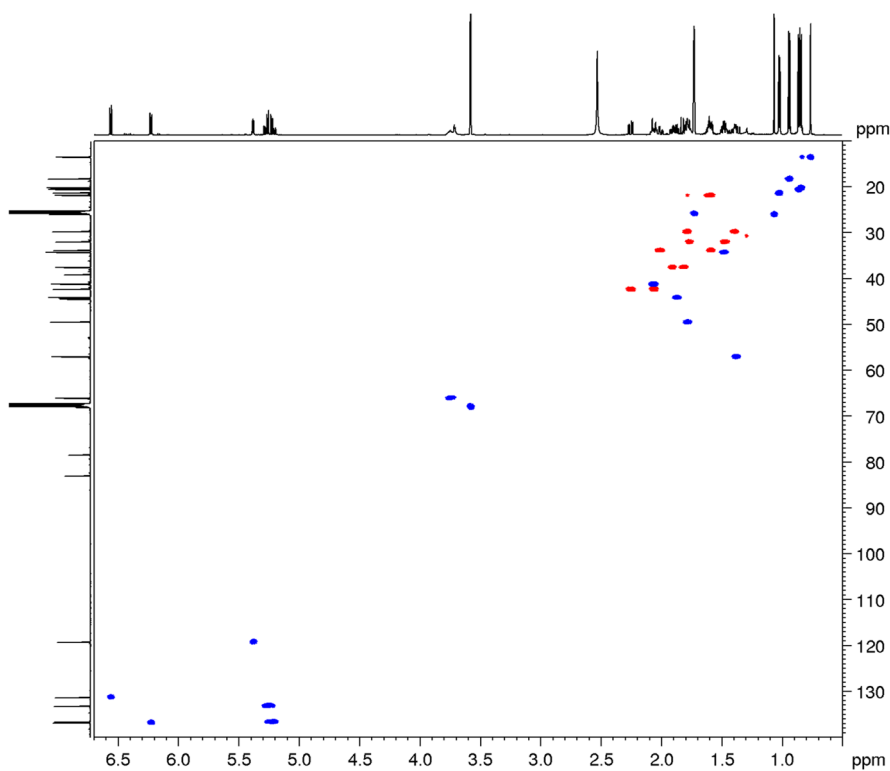

Figure S39. DEPT-edited HSQC spectrum of compound **6** (600 MHz, THF-*d*<sub>8</sub>, 295 K)

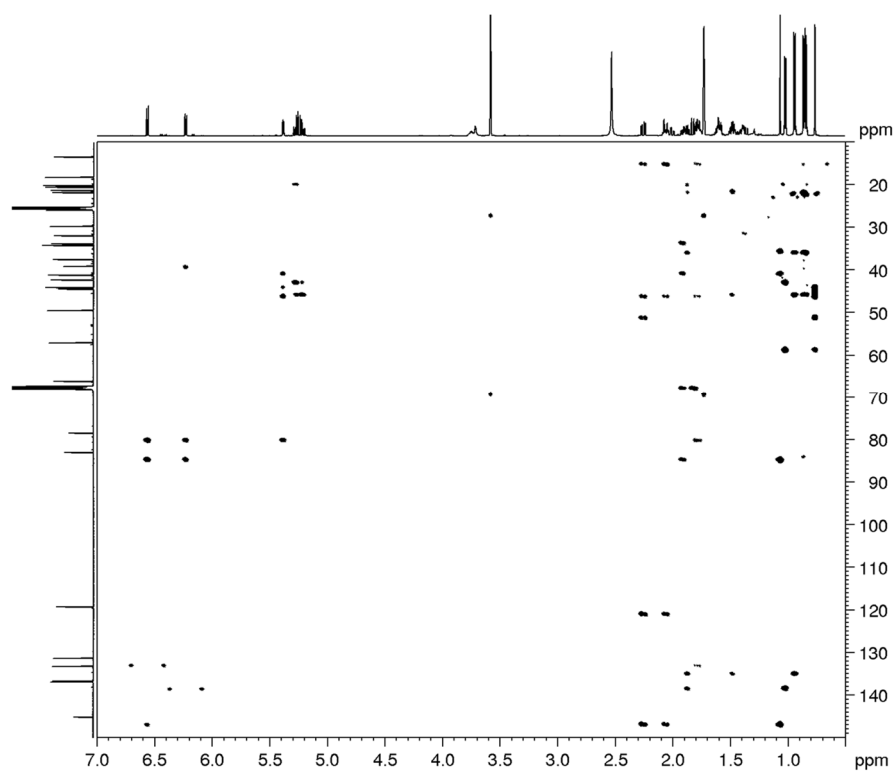

Figure S40. HMBC spectrum of compound **6** (600 MHz,  $\text{THF-}d_8$ , 295 K)

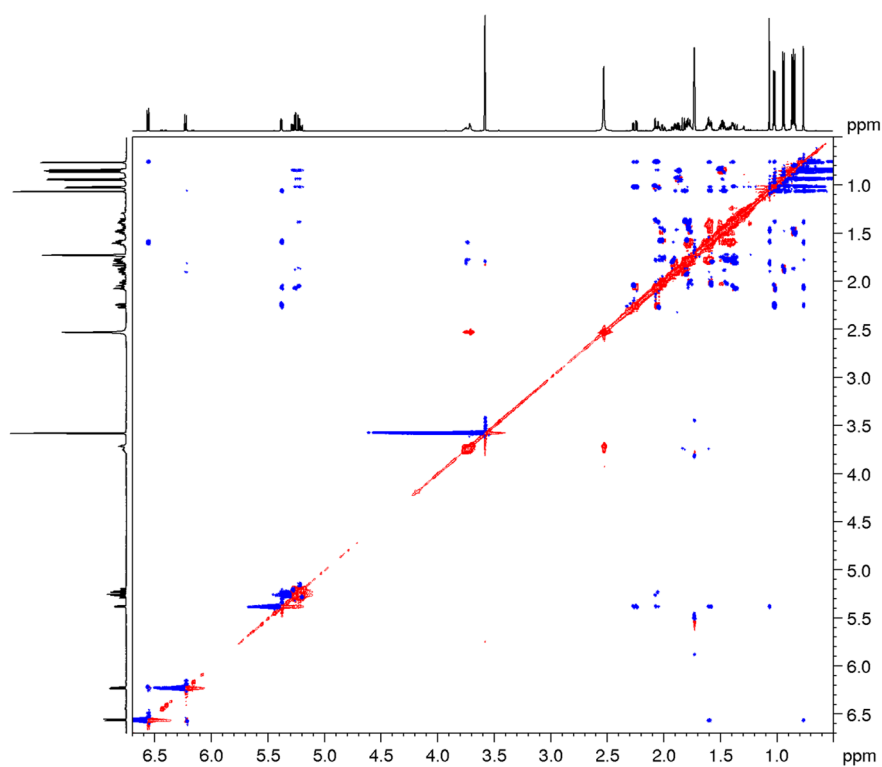

Figure S41. ROESY spectrum of compound **6** (600 MHz,  $\text{THF-}d_8$ , 295 K)

## Spectra and spectral data on compound 7

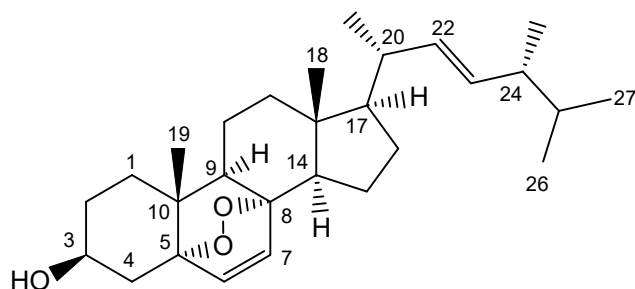

Ergosta-5,7,22-triene-3-ol (7): amorphous solid; HRESIMS  $m/z$  429.33597  $[M + H]^+$  ( $\Delta$  0.8 ppm;  $C_{28}H_{45}O_3$ ); HRESI-MSMS (CID = 15%, 30%, 45%; rel int %)  $m/z$  411 (82), 393 (28), 377 (100).

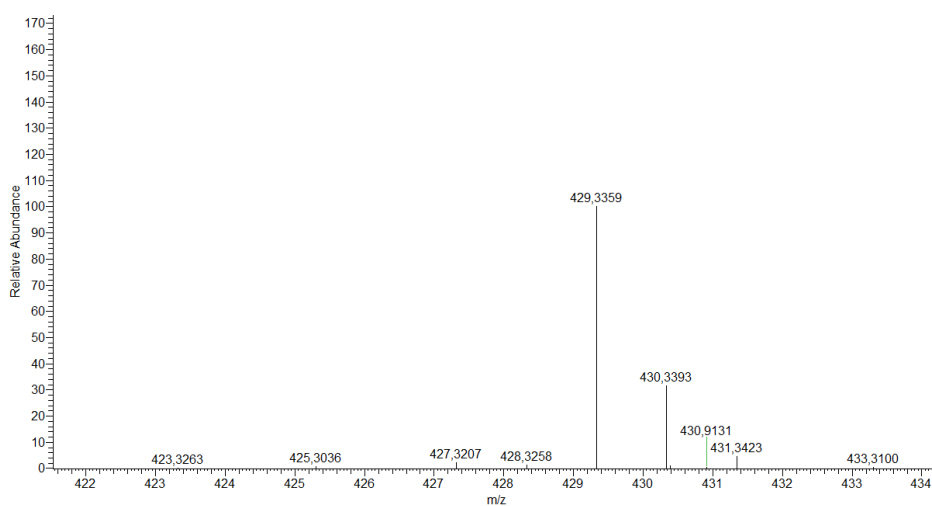

Figure S42. HRESI-MS spectrum of compound 7

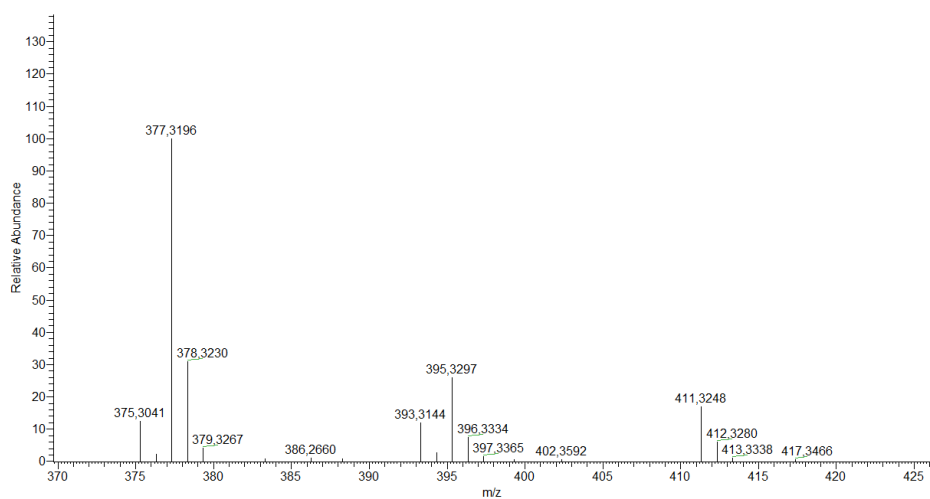

Figure S43. MS-MS spectrum of compound 7

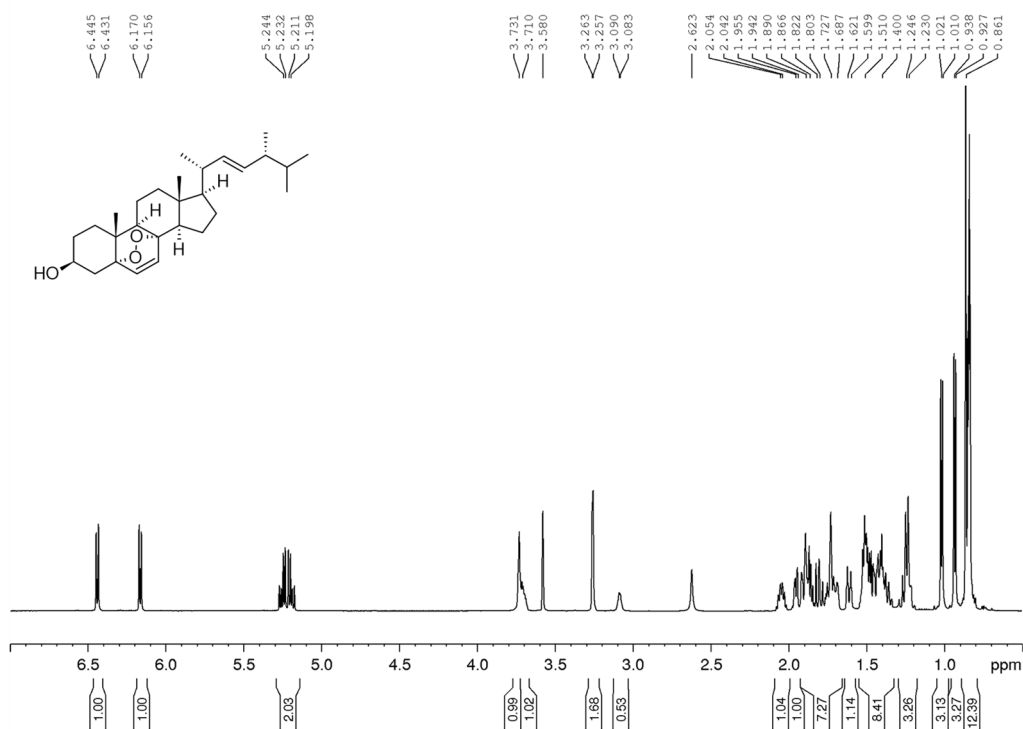

Figure S44. <sup>1</sup>H spectrum of compound 7 (600 MHz, THF-*d*<sub>8</sub>, 295 K)

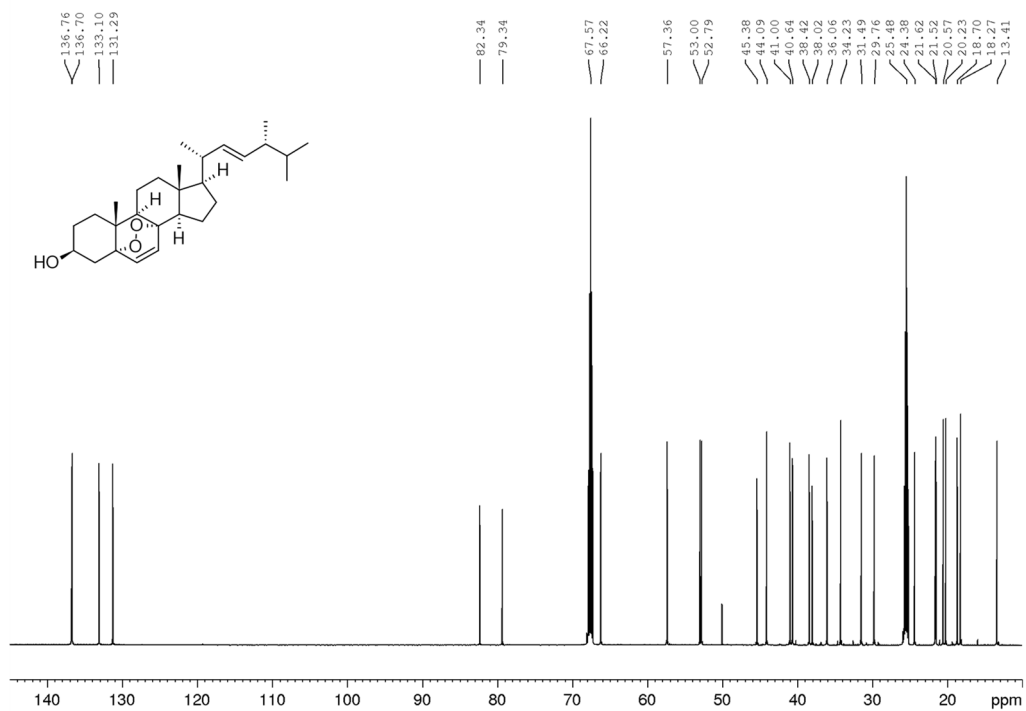

Figure S45. <sup>13</sup>C spectrum of compound 7 (150 MHz, THF-*d*<sub>8</sub>, 295 K)

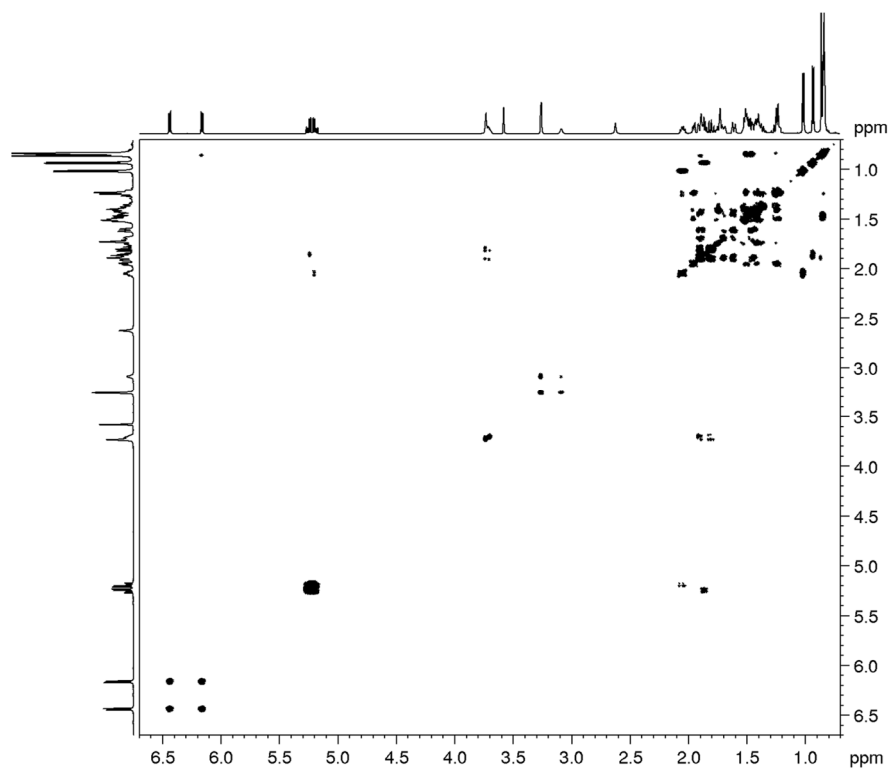

Figure S46. COSY spectrum of compound 7 (600 MHz, THF-*d*<sub>8</sub>, 295 K)

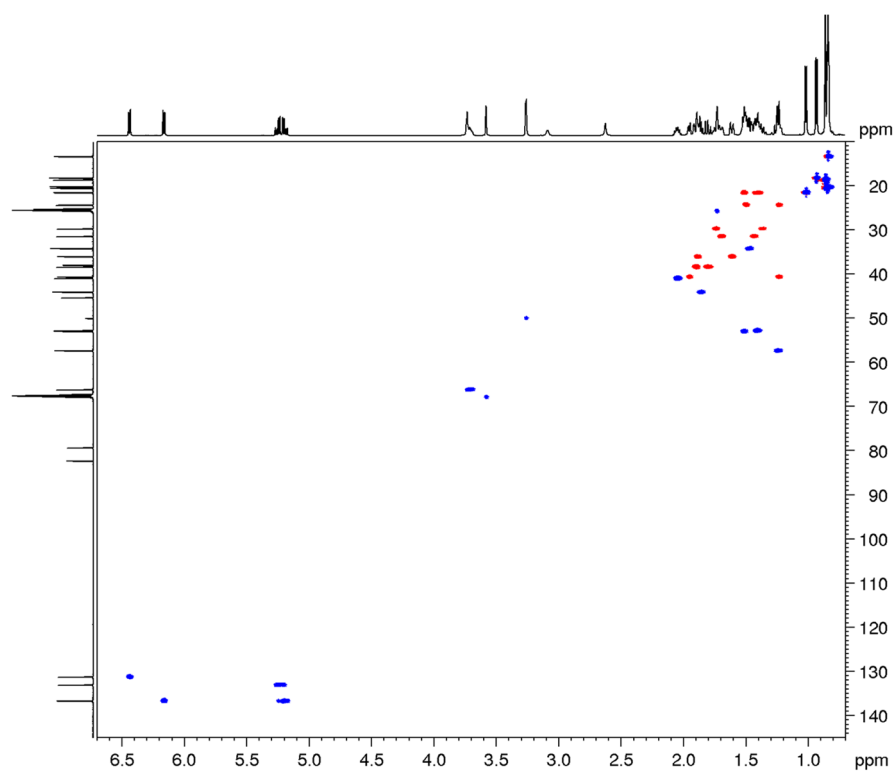

Figure S47. DEPT-edited HSQC spectrum of compound **7** (600 MHz, THF-*d*<sub>8</sub>, 295 K)

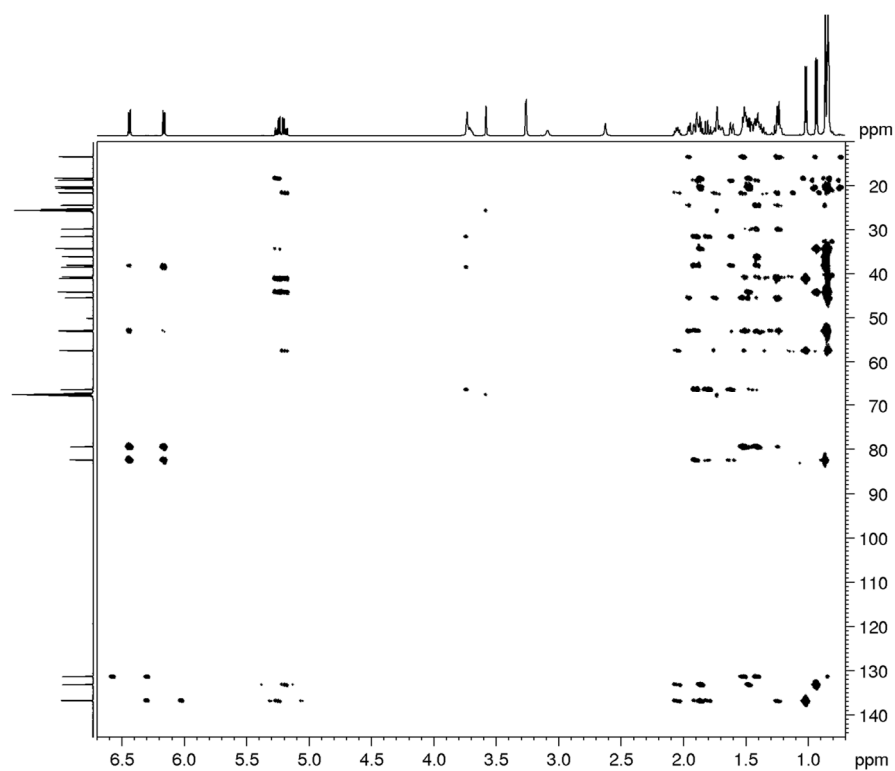

Figure S48. HMBC spectrum of compound **7** (600 MHz, THF-*d*<sub>8</sub>, 295 K)

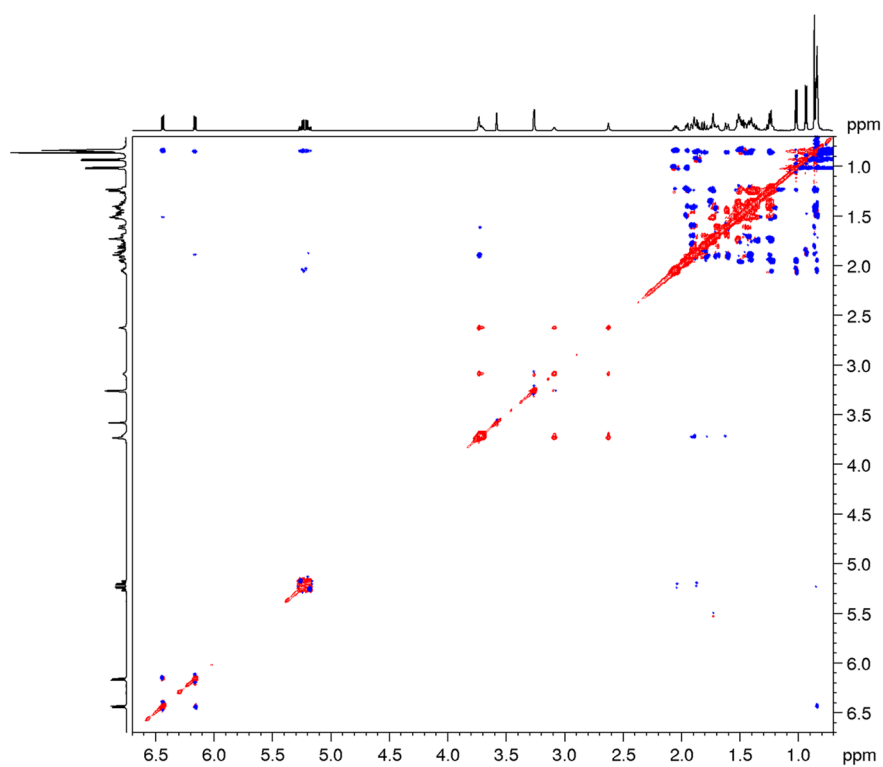

Figure S49. ROESY spectrum of compound 7 (600 MHz, THF-*d*<sub>8</sub>, 295 K)



Table S1. Complete  $^1\text{H}$  and  $^{13}\text{C}$  NMR resonance assignments for compounds **1** and **2**.

| No.                | <b>1</b>              |                    |                        | <b>2</b>              |                    |             |
|--------------------|-----------------------|--------------------|------------------------|-----------------------|--------------------|-------------|
|                    | $\delta^{13}\text{C}$ | $\delta^1\text{H}$ | $m, J$                 | $\delta^{13}\text{C}$ | $\delta^1\text{H}$ | $m, J$      |
| 1                  | 33.4                  | 1.73<br>1.38       | m<br>m                 | 29.7                  | 1.53<br>1.26       | m<br>m      |
| 2                  | 25.0                  | 2.09<br>1.62       | m<br>m                 | 23.6                  | 1.96<br>1.76       | m<br>m      |
| 3                  | 76.6                  | 3.93               | ddd, 10.1, 6.5, 2.0 Hz | 72.5                  | 3.73               | b t, 4.6 Hz |
| 4                  | 123.1                 | 5.49               | b s                    | 120.9                 | 5.59               | d, 4.6 Hz   |
| 5                  | 145.5                 | -                  | -                      | 147.4                 | -                  | -           |
| 6                  | 125.8                 | 5.88               | d, 9.6 Hz              | 125.9                 | 5.88               | d, 9.7 Hz   |
| 7                  | 126.0                 | 6.17               | d, 9.6 Hz              | 126.8                 | 6.21               | d, 9.7 Hz   |
| 8                  | 124.8                 | -                  | -                      | 124.9                 | -                  | -           |
| 9                  | 45.5                  | 1.97               | m                      | 44.9                  | 2.05               | m           |
| 10                 | 35.9                  | -                  | -                      | 36.0                  | -                  | -           |
| 11                 | 19.1                  | 1.60<br>1.52       | m<br>m                 | 19.4                  | 1.64<br>1.52       | m<br>m      |
| 12                 | 36.3                  | 2.02<br>1.26       | m<br>m                 | 36.4                  | 2.00<br>1.25       | m<br>m      |
| 13                 | 43.5                  | -                  | -                      | 43.6                  | -                  | -           |
| 14                 | 149.7                 | -                  | -                      | 149.7                 | -                  | -           |
| 15                 | 25.0                  | 2.40<br>2.29       | m<br>m                 | 25.0                  | 2.40<br>2.28       | m<br>m      |
| 16                 | 27.9                  | 1.77<br>1.44       | m<br>m                 | 27.9                  | 1.77<br>1.44       | m<br>m      |
| 17                 | 55.9                  | 1.21               | m                      | 55.8                  | 1.22               | m           |
| 18                 | 19.2                  | 0.92               | s                      | 19.1                  | 0.92               | s           |
| 19                 | 18.2                  | 0.89               | s                      | 17.1                  | 0.82               | s           |
| 20                 | 39.4                  | 2.11               | m                      | 39.4                  | 2.11               | m           |
| 21                 | 21.2                  | 1.04               | d, 6.7 Hz              | 21.2                  | 1.04               | d, 6.8 Hz   |
| 22                 | 135.3                 | 5.21               | m                      | 135.4                 | 5.22               | m           |
| 23                 | 132.2                 | 5.22               | m                      | 132.1                 | 5.22               | m           |
| 24                 | 42.8                  | 1.86               | m                      | 42.8                  | 1.87               | m           |
| 25                 | 33.1                  | 1.48               | m                      | 33.1                  | 1.47               | m           |
| 26                 | 19.7                  | 0.83               | d, 6.8 Hz              | 19.7                  | 0.83               | d, 6.8 Hz   |
| 27                 | 20.0                  | 0.84               | d, 6.8 Hz              | 20.0                  | 0.84               | d, 6.8 Hz   |
| 28                 | 17.6                  | 0.92               | d, 6.8 Hz              | 17.6                  | 0.93               | d, 6.8 Hz   |
| 3-OCH <sub>3</sub> | 55.4                  | 3.40               | s                      | 56.1                  | 3.36               | s           |

Table S2. Complete <sup>1</sup>H and <sup>13</sup>C NMR resonance assignments for compounds **4**, **5**, **6** and **7**.

| No.       | <b>4</b>              |                    |             | <b>6</b>              |                    |             | <b>7</b>              |                    |                  | <b>5</b>              |                    |             |
|-----------|-----------------------|--------------------|-------------|-----------------------|--------------------|-------------|-----------------------|--------------------|------------------|-----------------------|--------------------|-------------|
|           | $\delta^{13}\text{C}$ | $\delta^1\text{H}$ | <i>m, J</i> | $\delta^{13}\text{C}$ | $\delta^1\text{H}$ | <i>m, J</i> | $\delta^{13}\text{C}$ | $\delta^1\text{H}$ | <i>m, J</i>      | $\delta^{13}\text{C}$ | $\delta^1\text{H}$ | <i>m, J</i> |
| <b>1</b>  | 35.3                  | 2.02               | m           | 37.1                  | 1.82               | m           | 33.8                  | 2.01               | m                | 36.1                  | 1.88               | m           |
|           |                       | 1.77               | m           |                       | 1.08               | m           |                       | 1.59               | m                |                       | 1.61               | m           |
| <b>2</b>  | 34.9                  | 2.46               | m           | 38.0                  | 1.72               | m           | 32.0                  | 1.76               | m                | 31.5                  | 1.67               | m           |
|           |                       | 2.29               | m           |                       | 1.28               | m           |                       | 1.47               | m                |                       | 1.43               | m           |
| <b>3</b>  | 197.2                 | -                  | -           | 71.0                  | 3.60               | m           | 66.1                  | 3.75               | m                | 66.2                  | 3.71               | m           |
| <b>4</b>  | 124.3                 | 5.61               | s           | 31.4                  | 1.80               | m           | 37.5                  | 1.90               | m                | 38.4                  | 1.89               | m           |
|           |                       |                    |             |                       | 1.39               | m           |                       | 1.82               | m                |                       | 1.80               | m           |
| <b>5</b>  | 163.3                 | -                  | -           | 40.2                  | 1.40               | m           | 83.0                  | -                  | -                | 82.3                  | -                  | -           |
| <b>6</b>  | 125.8                 | 6.05               | d, 9.5 Hz   | 29.6                  | 1.76               | m           | 136.9                 | 6.23               | d, 8.5 Hz        | 136.7                 | 6.16               | d, 8.5 Hz   |
| <b>7</b>  | 133.8                 | 6.60               | d, 9.5 Hz   | 117.4                 | 5.16               | m           | 131.3                 | 6.56               | d, 8.5 Hz        | 131.3                 | 6.44               | d, 8.5 Hz   |
| <b>8</b>  | 125.9                 | -                  | -           | 139.6                 | -                  | -           | 78.4                  | -                  | -                | 79.3                  | -                  | -           |
| <b>9</b>  | 155.7                 | -                  | -           | 49.4                  | 1.65               | m           | 145.2                 | -                  | -                | 52.8                  | 1.40               | m           |
| <b>10</b> | 37.7                  | -                  | -           | 34.2                  | -                  | -           | 39.1                  | -                  | -                | 38.0                  | -                  | -           |
| <b>11</b> | 26.0                  | 2.51               | m           | 21.5                  | 1.58               | m           | 119.3                 | 5.38               | dd, 6.0. 1.9 Hz  | 24.4                  | 1.49               | m           |
|           |                       | 2.37               | m           |                       | 1.47               | m           |                       |                    |                  |                       | 1.23               | m           |
| <b>12</b> | 37.0                  | 2.11               | m           | 39.4                  | 2.00               | m           | 42.3                  | 2.25               | dd, 16.8. 6.0 Hz | 40.6                  | 1.94               | m           |
|           |                       | 1.31               | m           |                       | 1.23               | m           |                       | 2.06               |                  |                       | 1.23               | m           |
| <b>13</b> | 45.0                  | -                  | -           | 43.3                  | -                  | -           | 44.5                  | -                  | -                | 45.4                  | -                  | -           |
| <b>14</b> | 45.7                  | 2.13               | m           | 55.1                  | 1.81               | m           | 49.5                  | 1.78               | m                | 53.0                  | 1.51               | m           |
|           |                       |                    | m           | 22.9                  | 1.49               | m           |                       |                    |                  |                       |                    |             |
| <b>15</b> | 20.1                  | 1.71               | m           | 28.1                  | 1.38               | m           | 21.8                  | 1.60               | m                | 21.6                  | 1.51               | m           |
|           |                       | 1.66               | m           |                       | 1.72               | m           |                       |                    |                  |                       | 1.40               | m           |
| <b>16</b> | 28.9                  | 1.82               | m           | 55.9                  | 1.25               | m           | 29.8                  | 1.79               | m                | 29.8                  | 1.73               | m           |
|           |                       | 1.52               | m           |                       | 1.25               | m           |                       | 1.39               | m                |                       | 1.37               | m           |
| <b>17</b> | 57.0                  | 1.27               | m           | 12.1                  | 0.54               | s           | 57.0                  | 1.38               | m                | 57.4                  | 1.24               | m           |

|           |       |      |           |       |      |           |       |      |           |       |      |           |
|-----------|-------|------|-----------|-------|------|-----------|-------|------|-----------|-------|------|-----------|
| <b>18</b> | 19.4  | 1.00 | s         | 13.0  | 0.80 | s         | 13.5  | 0.76 | s         | 13.4  | 0.83 | m         |
| <b>19</b> | 17.1  | 1.00 | s         | 40.5  | 2.01 | m         | 26.0  | 1.07 | s         | 18.7  | 0.86 | m         |
| <b>20</b> | 40.6  | 2.19 | m         | 21.1  | 1.02 | d, 6.8 Hz | 41.2  | 2.07 | m         | 41.0  | 2.04 | m         |
| <b>21</b> | 21.8  | 1.08 | d, 6.7 Hz | 135.7 | 5.17 | m         | 21.3  | 1.02 | d, 6.7 Hz | 21.5  | 1.02 | d, 6.5 Hz |
| <b>22</b> | 136.5 | 5.27 | m         | 131.8 | 5.20 | m         | 136.7 | 5.23 | m         | 136.8 | 5.20 | m         |
| <b>23</b> | 133.4 | 5.28 | m         | 42.8  | 1.85 | m         | 133.2 | 5.26 | m         | 133.1 | 5.23 | m         |
| <b>24</b> | 44.2  | 1.89 | m         | 33.1  | 1.47 | m         | 44.1  | 1.87 | m         | 44.1  | 1.86 | m         |
| <b>25</b> | 34.3  | 1.48 | m         | 19.6  | 0.82 | d, 6.8 Hz | 34.3  | 1.48 | m         | 34.2  | 1.47 | m         |
| <b>26</b> | 20.2  | 0.85 | d, 6.8 Hz | 19.9  | 0.84 | d, 6.8 Hz | 20.2  | 0.84 | d, 6.8 Hz | 20.2  | 0.83 | m         |
| <b>27</b> | 20.6  | 0.87 | d, 6.8 Hz | 17.6  | 0.91 | d, 6.8 Hz | 20.6  | 0.86 | d, 6.8 Hz | 20.6  | 0.85 | m         |
| <b>28</b> | 18.3  | 0.96 | d, 6.8 Hz |       |      |           | 18.2  | 0.94 | d, 6.8 Hz | 18.3  | 0.93 | m         |

---

Table S3. Complete  $^1\text{H}$  and  $^{13}\text{C}$  NMR resonance assignments for compound **3**

| No.        | <b>3</b>              |                    |                      |
|------------|-----------------------|--------------------|----------------------|
|            | $\delta^{13}\text{C}$ | $\delta^1\text{H}$ | $\mathbf{m, J}$      |
| <b>2</b>   | 87.2                  | 5.30               | dd, 9.7; 7.9 Hz, 1H  |
| <b>3</b>   | 33.7                  | 3.41               | dd, 15.9; 9.7 Hz, 1H |
|            |                       | 3.09               | dd, 15.9; 7.9 Hz, 1H |
| <b>3a</b>  | 128.2                 | -                  | -                    |
| <b>4</b>   | 125.8                 | 7.73               | M                    |
| <b>5</b>   | 130.4                 | -                  | -                    |
| <b>6</b>   | 133.2                 | 7.68               | dd, 8.2; 1.7 Hz      |
| <b>7</b>   | 109.5                 | 6.90               | d, 8.2 Hz            |
| <b>7a</b>  | 165.2                 | -                  | -                    |
| <b>1'</b>  | 143.1                 | -                  | -                    |
| <b>2'</b>  | 112.8                 | 5.10               | m                    |
|            |                       | 4.95               | m                    |
| <b>3'</b>  | 17.0                  | 1.77               | s                    |
| <b>1''</b> | 190.7                 | 9.83               | s                    |
